1  
2  
3  
4  
5 **Conservation and divergence of myelin proteome and oligodendrocyte**  
6 **transcriptome profiles between humans and mice**  
7  
8  
9

10 Vasiliki-Ilya Gargareta<sup>1,#</sup>, Josefine Reuschenbach<sup>1,#</sup>, Sophie B. Siems<sup>1,#</sup>, Ting Sun<sup>1,#,\*</sup>, Lars  
11 Piepkorn<sup>2,3</sup>, Carolina Mangana<sup>1</sup>, Erik Späte<sup>1</sup>, Sandra Goebbels<sup>1</sup>, Inge Huitinga<sup>4</sup>, Wiebke  
12 Möbius<sup>1,5</sup>, Klaus-Armin Nave<sup>1</sup>, Olaf Jahn<sup>2,3,\*</sup> and Hauke B. Werner<sup>1,\*</sup>  
13

14 <sup>1</sup>Department of Neurogenetics, Max Planck Institute of Experimental Medicine, 37075 Göttingen, Germany

15 <sup>2</sup>Proteomics Group, Max Planck Institute of Experimental Medicine, 37075 Göttingen, Germany

16 <sup>3</sup>Translational Neuroproteomics Group, Department of Psychiatry and Psychotherapy, University Medical  
17 Center Göttingen, Georg-August-University, 37075 Göttingen, Germany

18 <sup>4</sup>Neuroimmunology Group, Netherlands Institute for Neuroscience, 1105 Amsterdam, The Netherlands

19 <sup>5</sup>Electron Microscopy Unit, Max Planck Institute of Experimental Medicine, 37075 Göttingen, Germany

20 #These authors contributed equally  
21

22 **\*Correspondence**

23 Dr. Ting Sun, Department of Neurogenetics OR

24 Dr. Olaf Jahn, Proteomics Group OR

25 Dr. Hauke Werner, Department of Neurogenetics

26 Max Planck Institute of Experimental Medicine

27 Hermann Rein Str. 3

28 D-37075 Göttingen, Germany  
29

30 **Key words**

31 Oligodendrocyte; myelin sheath; axon-glia interaction; label-free proteomics; scRNA-seq;  
32 cross-species comparison  
33

34 **Reviewer login information to the proteome data repository**

35 ProteomeXchange Consortium PRIDE partner repository

36 Login data are provided in the Letter to the Editor  
37

38 **Word and Figure count**

39 150 words (abstract), 4255 words (main text)

40 4 main figures, 8 figure supplements, 4 source data files  
41  
42

43 **Abstract**

44

45 Human myelin disorders are commonly studied in mouse models. Since both clades  
46 evolutionarily diverged approximately 85 million years ago, it is critical to know to what extent the  
47 myelin protein composition has remained similar. Here we use quantitative proteomics to  
48 analyze myelin purified from human white matter and find that the relative abundance of the  
49 structural myelin proteins PLP, MBP, CNP and SEPTIN8 correlates well with that in C57Bl/6N-  
50 mice. Conversely, multiple other proteins were identified exclusively or predominantly in  
51 human or mouse myelin. This is exemplified by peripheral myelin protein-2 (PMP2), which was  
52 specific to human CNS myelin, while tetraspanin-2 (TSPAN2) and connexin-29 (CX29/GJC3)  
53 were confined to mouse myelin. Assessing published scRNA-seq-datasets, human and mouse  
54 oligodendrocytes display well-correlating transcriptome profiles but divergent expression of  
55 distinct genes including *Pmp2*, *Tspan2* and *Gjc3*. Species-dependent diversity of  
56 oligodendroglial mRNA-expression and myelin protein composition can be informative when  
57 translating from mouse models to humans.

58

59

## 60 **Introduction**

61  
62 Myelination of axons by oligodendrocytes facilitates rapid, saltatory impulse propagation in the  
63 central nervous system (CNS) of vertebrates <sup>1</sup>. The relevance of myelin for efficient motor,  
64 sensory and cognitive performance is illustrated by their decline in dysmyelinating and  
65 demyelinating disorders including multiple sclerosis (MS) and leukodystrophies and in  
66 respective mouse models <sup>2</sup>. MS is a human-specific autoimmune disorder for which it has  
67 remained difficult to establish a genuine mouse model, an observation that might point at the  
68 existence of human-specific antigens in myelin. Generated by mature oligodendrocytes (MOL),  
69 myelin consists of multiple concentric layers of specialized plasma membrane. The  
70 ultrastructure of myelin is highly ordered with closely apposed, compacted membrane layers  
71 and a non-compacted cytoplasmic channel system that includes the adaxonal myelin layer and  
72 paranodal loops. The formation of these sub-compartments is enabled by highly enriched,  
73 specialized myelin proteins. For example, the transmembrane-tetraspan proteolipid protein  
74 (PLP) supports extracellular membrane apposition and adhesion <sup>3</sup>, the cytoplasmic myelin  
75 basic protein (MBP) mediates intracellular membrane apposition <sup>4</sup>, and the enzyme cyclic  
76 nucleotide phosphodiesterase (CNP) contributes to structuring noncompact myelin  
77 compartments <sup>5,6</sup>. In fact, using the gel-based methods available at that time, PLP, MBP and  
78 CNP were early recognized as exceptionally abundant myelin proteins in the CNS of tetrapods  
79 <sup>7,8</sup>. Since then, the number of known myelin proteins has markedly increased, including  
80 proteins with enzymatic, cytoskeletal, adhesive and immune-related functions <sup>1</sup>, and it became  
81 possible to quantify their relative abundance by mass spectrometry <sup>9</sup>.

82  
83 Myelin biology is primarily studied in mice and zebrafish <sup>10</sup>. The considerable differences  
84 between the species, including dimension and morphology of bodies and brains, motor  
85 performance, cognition and ecosystem, are owed to evolutionary changes since their last  
86 common ancestor about 420 million years ago (mya) <sup>11</sup>. Already early gel-based comparisons  
87 between CNS myelin fractions purified from various fish and tetrapod species revealed that  
88 the clades comprise overlapping but divergent sets of major myelin proteins <sup>8,12</sup>. More recently,  
89 this finding was extended to low-abundant constituents when quantitative mass spectrometry  
90 allowed comparing the CNS myelin proteome between zebrafish and mice <sup>13</sup>. By quantitative  
91 proteome analysis, MBP is highly abundant in CNS myelin of either species. Apart from MBP,  
92 however, their myelin proteome differs qualitatively and quantitatively. Thus, the protein  
93 composition of myelin displays species-dependent diversity, which can be assessed by mass  
94 spectrometry.

95

96 No animal model provides an exact replica of the human nervous system. The rodent and  
97 primate clades diverged approximately 85 mya<sup>14</sup>. In consequence, mice and humans went  
98 through considerable evolutionary time since their last common ancestor. To understand  
99 myelination and myelin-related diseases in humans it is thus relevant to investigate the  
100 molecular profiles of human oligodendrocytes and myelin, and, optimally, to compare them  
101 with their orthologs in relevant model species. There are evident ethical and methodological  
102 limitations to studies involving living humans. However, *post mortem* material donated for  
103 scientific assessment has become available. For example, the rates of oligodendrocyte  
104 turnover and myelin renewal have been evaluated in humans, including in multiple sclerosis  
105 patients<sup>15</sup>. It has also become possible to determine transcriptional profiles of  
106 oligodendrocytes in both humans and mice, including in disease conditions<sup>16–18</sup>.

107  
108 In the present study we used quantitative mass spectrometry to systematically examine the  
109 protein composition of myelin purified from the subcortical white matter of human subjects *post*  
110 *mortem*. Whereas the relative abundance of many structural myelin proteins is roughly similar  
111 between human and mouse CNS myelin – the latter as recently established by assessing  
112 c56Bl/6N mouse brains using the same methodology<sup>9</sup> - we observed striking qualitative and  
113 quantitative differences in the relative abundance of multiple other myelin proteins. By  
114 integrating and comparing previously established scRNA-seq datasets we found that their  
115 presence in myelin is largely reflected in the transcriptome profiles of mature oligodendrocytes  
116 (MOL). Our findings thus reveal unexpected differences in the molecular profiles of CNS myelin  
117 and oligodendrocytes between humans and mice. Considering their evolutionary divergence  
118 enables a more informed translation from mouse models to humans.

119  
120

## 121 Results

122

### 123 Proteome analysis of human CNS myelin

124 To systematically identify and quantify the protein constituents of human CNS myelin, we  
125 biochemically purified a myelin-enriched light-weight membrane fraction from the normal-  
126 appearing white matter of five human subjects post-mortem. By electron microscopic  
127 assessment of the myelin fraction, constituents other than multilamellar myelin sheaths were  
128 largely absent (**Figure 1-supplement 1**), confirming that other membrane fractions had been  
129 efficiently removed.

130

131 We then subjected both the myelin fraction and the corresponding brain homogenate to  
132 solubilization using ASB-14 and high urea concentration, automated in-solution tryptic digest  
133 by filter-aided sample preparation (FASP), peptide fractionation by nanoUPLC, and ESI-QTOF  
134 mass spectrometry involving data-independent acquisition (DIA) of data. The utilized MS<sup>E</sup>  
135 mode facilitates simultaneous quantification and identification of all peptides entering the mass  
136 spectrometer. Proteins can thus be quantified by correlating signal intensities of peptides with  
137 those of a spike-in protein of known concentration (TOP3 method; <sup>19</sup>). When assessing myelin  
138 by MS<sup>E</sup> we quantified 332 proteins (**Figure 1-source data 1**; labeled in green in **Figure 1a**)  
139 with a false discovery rate (FDR) of <1% and an average sequence coverage of 39.6%. When  
140 using the ultra-definition (UD)-MS<sup>E</sup> mode, in which ion mobility spectrometry enables an  
141 additional separation of peptides after chromatography and before mass measurement, we  
142 identified and quantified 835 proteins with an average sequence coverage of 37.0% (**Figure**  
143 **1-source data 1**; labeled in blue in **Figure 1a**). The MS<sup>E</sup> mode quantified myelin proteins with  
144 a dynamic range of over four orders of magnitude parts per million (ppm), thereby allowing the  
145 reliable quantification of all myelin constituents including the exceptionally abundant PLP, MBP  
146 and CNP. The UDMS<sup>E</sup> mode identified over twice as many proteins as MS<sup>E</sup>, though with a  
147 compressed dynamic range of only about three orders of magnitude ppm. Expectedly, the MS<sup>E</sup>  
148 and UDMS<sup>E</sup> datasets correlated well with a correlation coefficient of >0.8 (**Figure 1b**; **Figure**  
149 **1-supplement 2**). Both datasets taken together, we identified 848 proteins in human CNS  
150 myelin by LC-MS analysis. Importantly, the strategy of direct label-free quantification provides  
151 information about the relative abundance of identified proteins. When comparing the relative  
152 abundance of proteins in the myelin fraction and the corresponding homogenate, we found  
153 known myelin markers enriched in the myelin fraction (**Figure 1c**). Markers for other cell types  
154 or compartments were either reduced in abundance in the myelin fraction compared to brain  
155 lysate or not identified at all (**Figure 1-supplement 3**). This indicates that the fraction is suited  
156 for proteomic analysis of human myelin.

157

## 158 **Relative abundance of CNS myelin proteins in humans**

159 We used the MS<sup>E</sup> dataset to calculate the relative abundance of myelin proteins in the human  
160 white matter (**Figure 1d**), considering that quantification of exceptionally abundant proteins  
161 requires a high dynamic range. The most abundant myelin proteins were the structural  
162 constituents proteolipid protein (PLP), myelin basic protein (MBP) and cyclic nucleotide  
163 phosphodiesterase (CNP), which accounted for 44.8%, 28.4% and 4.5% of the total myelin  
164 protein, respectively. In addition, numerous known myelin proteins were identified and  
165 quantified at lower abundance (**Figure 1d**). Previously known myelin proteins constituted  
166 approximately 82% of the total human myelin protein (**Figure 1d**), while the remaining 18%  
167 were accounted for by other proteins, including occasional contaminants from other cellular  
168 sources (**Figure 1-supplement 3**).

## 170 **Comparison to the mouse myelin proteome**

171 We hypothesized that the protein composition of human and mouse myelin displays some  
172 degree of divergence. To compare human and mouse myelin, we first separated myelin of both  
173 species by SDS-PAGE. By silver staining, the band patterns were roughly comparable but not  
174 identical (**Figure 2a**), supporting the hypothesis that some differences exist. To elucidate  
175 differences at the molecular level, we compared the present human mass spectrometric data  
176 with those of our recent proteomic analysis of myelin purified from the brains of C57Bl/6N mice  
177 using the same workflow and methodology<sup>9</sup> (ProteomeXchange Consortium PRIDE partner  
178 repository, dataset identifier PXD020007). As expected, the majority of known myelin proteins  
179 was identified in myelin of both species (**Figure 2b**). However, a subset of known myelin  
180 proteins was identified only in either human or mouse myelin (**Figure 2b**), in agreement with  
181 the hypothesis that the protein composition of myelin is not identical across these species.

182  
183 For example, we noted that peripheral myelin protein 2 (PMP2, also termed P2 or fatty acid  
184 binding protein (FABP8)) was identified in human CNS myelin (**Figure 2b**). PMP2 has long  
185 been known as a constituent of myelin in the peripheral nervous system (PNS) synthesized by  
186 Schwann cells<sup>20,21</sup> but based on rodent studies was assumed to be absent from CNS myelin.  
187 Yet, PMP2 was readily detected in human CNS myelin by both immunoblotting (**Figure 2-**  
188 **supplement 1a**) and immunohistochemistry (**Figure 2-supplement 1b**), thus confirming its  
189 mass spectrometric identification. In contrast, PMP2 was not detected in mouse CNS myelin  
190 by immunoblot (**Figure 2-supplement 1a**). In agreement with prior work<sup>20</sup> PMP2 was readily  
191 detected in mouse PNS myelin (**Figure 2-supplement 1a**), indicating that the utilized  
192 antibodies detect PMP2 of either species. Together this substantiates the existence of species-  
193 dependent differences in the protein composition of CNS myelin between humans and mice.

194

195 Next we plotted all proteins identified in human CNS myelin, i.e. the present MS<sup>E</sup> and UDMS<sup>E</sup>  
196 datasets, against those identified in mouse myelin as recently established using the same  
197 methodology<sup>9</sup> (ProteomeXchange Consortium PRIDE partner repository, dataset identifier  
198 PXD020007). Indeed, the datasets correlated well with correlation coefficients of 0.88 (MS<sup>E</sup>)  
199 and 0.59 (UDMS<sup>E</sup>) (**Figure 2c,d**) but clearly diverged to some extent. We therefore cross-  
200 compared the abundance of individual myelin proteins in human and mouse myelin by MS<sup>E</sup>  
201 using heatmap visualization (**Figure 2e**). We found that major structural myelin proteins  
202 including PLP, MBP, CNP, SEPTIN2, SEPTIN7 and SEPTIN8 displayed a similar relative  
203 abundance in myelin of both species. However, several other myelin proteins were  
204 comparatively more abundant in human myelin, as exemplified by crystallin- $\alpha$ B (CRYAB), CD9  
205 (also termed tetraspanin-29/TSPAN29), and peptidyl arginine deiminase (PADI2), or in mouse  
206 myelin, including myelin-associated oligodendrocyte basic protein (MOBP), sirtuin-2 (SIRT2),  
207 and carbonic anhydrase 2 (CA2). Importantly, when detecting these proteins by  
208 immunoblotting in myelin of both species (**Figure 2f**) these results were generally consistent  
209 with the mass spectrometric comparison (**Figure 2e**). Yet, quantitative mass spectrometry  
210 emerged as more straightforward than immunoblotting when comparing the relative  
211 abundance of proteins across species if species-dependent differences in splice isoforms  
212 exist. This is exemplified by MBP, which - owing to species-dependent alternative splicing<sup>22</sup> -  
213 displays three main isoforms (14.0, 17.0 and 18.5 kDa) in mouse CNS myelin but only one  
214 dominant isoform (18.5 kDa) in human CNS myelin, in agreement with previous observations  
215<sup>23,24</sup>. Taken together, the protein composition of human and mouse CNS myelin is similar with  
216 respect to the relative abundance of major structural proteins but displays remarkable  
217 qualitative and quantitative differences regarding many other myelin proteins.

218

### 219 **Integrated scRNA-seq profile of human and mouse mature oligodendrocytes (MOL)**

220 To identify species-dependent transcriptional differences that may underlie the diversity of the  
221 myelin proteome, we utilized high-resolution mRNA-abundance profiles to assess the  
222 oligodendrocyte lineage in both humans and mice. To this aim, we retrieved previously  
223 published scRNA-seq datasets from the CNS of humans<sup>17,18,25-28</sup> and mice<sup>16,28-33</sup> and  
224 evaluated all cells designated as oligodendrocyte progenitor cells (termed OPC in the  
225 following), newly formed oligodendrocytes (termed NFO) and mature oligodendrocytes  
226 (termed MOL) from non-diseased subjects (**Figure 3-supplement 1a,b**, **Figure 3-source data**  
227 **1**). Using the SCTransform pipeline within the R toolkit Seurat, it was possible to integrate cells  
228 from all available human and mouse datasets into respective single objects (**Figure 3-**  
229 **supplement 1a,b**). Importantly, cells from all studies distributed well across the uniform  
230 manifold approximation and projection (UMAP)-plots (**Figure 3-supplement 1a,b**), implying  
231 suitability for integration and further assessment. Indeed, when highlighting marker gene



232 expression on UMAP projections, cells expressing markers for OPCs (*CSPG4*, *PCDH15*,  
233 *PDGFRA*, *PTPRZ1*) or MOL (*ANLN*, *CNP*, *MBP*, *PLP1*) clustered well in both the human and  
234 mouse integrated datasets (**Figure 3-supplement 1c,e**). Notably, however, multiple myelin-  
235 related transcripts displayed considerable expression only in human or mouse  
236 oligodendrocytes, as exemplified by *TSPAN2*, *GJC3* and *PMP2* (**Figure 3-supplement 1f**).  
237 We noted that cells expressing NFO markers (*BMP4*, *ENPP6*, *FYN*, *GPR17*) clustered well in  
238 the mouse but not the human integrated dataset (**Figure 3-supplement 1d**), probably owing  
239 to the low number of NFO in the latter. Indeed, only 132 NFO were comprised in the human  
240 scRNA-seq datasets, considerably fewer compared to 10,391 NFO recovered from the mouse  
241 datasets (**Figure 3-source data 1**). For this reason we focused on mature oligodendrocytes  
242 (MOL) for a more thorough species-dependent comparison of transcriptional profiles of myelin-  
243 related genes.

244  
245 To this aim we subset all cells annotated as MOL from control samples in all datasets of both  
246 species <sup>16–18,25–33</sup> (**Figure 3a**) for integration via SCTransform. Mouse gene symbols were  
247 translated to human gene symbols prior to data integration. Importantly, cells from both species  
248 distributed well across the UMAPs (**Figure 3b,c**), providing the basis for assessing the  
249 transcriptional profiles of 41,517 human and 95,966 mouse MOL. At the level of gene  
250 expression, cells expressing myelin marker transcripts (*ANLN*, *CNP*, *GSN*, *MBP*, *PLLP*, *PLP1*)  
251 distributed similar across human and mouse MOL (**Figure 3d**), as did transcripts encoding  
252 myelination-related transcription factors (*MYRF*, *SOX10*) (**Figure 3e**). Notably, multiple  
253 myelin-related transcripts displayed exclusive or predominant expression in MOL of only one  
254 of the species, as exemplified by *PMP2*, *PADI2*, *CA2*, *TSPAN2* and *GJC3* (**Figure 3f**). Also,  
255 when assessed in the species-separately integrated datasets of all oligodendroglial cells  
256 including OPC, NFO and MOL, these genes displayed little or no expression in the respective  
257 other species (**Figure 3-supplement 1f**).

258  
259 To compare the transcriptome profiles of human and mouse MOL without the influence of  
260 sequencing batch effects, we applied van der Waerden (vdW)-ordered quantile transformation  
261 to the mean mRNA abundance values of 3,000 integration features (i.e., genes) in all cells  
262 designated as MOL in all individual datasets and calculated the average relative transcript  
263 abundance in both human and mouse MOL. The averaged vdW-normalized mRNA-  
264 abundance profiles correlated reasonably well with a coefficient of 0.59 (**Figure 3-supplement**  
265 **2**). However, a higher correlation coefficient of 0.82 was found when comparing only known  
266 myelin-related transcripts (n=34 transcripts; highlighted as blue data points in **Figure 3-**  
267 **supplement 2**). This indicates that the transcriptional profiles of known myelin-related  
268 transcripts are more similar between humans and mice than those of other transcripts



269 expressed in MOL. In particular, the abundance of several transcripts encoding structural  
270 myelin proteins, including *PLP1*, *MBP* and *CNP*, was essentially equal between human and  
271 mouse MOL. Also the abundance of transcripts for myelin-related transcription factors (*MYRF*,  
272 *OLIG1*, *OLIG2*, *SOX10*) was roughly similar (labelled in green in **Figure 3-supplement 2**). We  
273 noted that the most abundant transcripts in MOL also included genes of which the protein  
274 products were not mass spectrometrically identified in myelin - and thus not comprised in the  
275 myelin proteome - either because they are secreted (*FTH1*, *TF*, *APOD*) or display a non-  
276 suitable tryptic digest pattern (MAL) (labelled in orange **Figure 3-supplement 2**). The  
277 abundance of these transcripts also correlated well between human and mouse MOL. As an  
278 exception, the abundance of *APOE* mRNA was considerably higher in mouse MOL compared  
279 to human MOL (**Figure 3-supplement 2**).

280  
281 Taken together, the integrated scRNA-seq profiles of MOL generally correlated well between  
282 humans and mice, in particular with respect to most known myelin-related mRNAs. However,  
283 multiple distinct transcripts were found with qualitatively or quantitatively divergent abundance  
284 when compared between the species. It is also noteworthy that the degree of correlation is  
285 lower when comparing the myelin proteome (by either MS<sup>E</sup> or UDMS<sup>E</sup>) with the averaged vdW-  
286 normalized mRNA abundance profile of MOL in both humans and mice (**Figure 3-supplement**  
287 **3**).

288

### 289 **Subpopulation analysis of integrated human and mouse MOL scRNA-seq profile**

290 Previously, multiple transcriptome studies have identified distinct subpopulations of MOL in  
291 both humans and mice<sup>16,17,29</sup>, which were correlated according to the expression of marker  
292 genes. Here, we tested whether similar subpopulations also manifest if evaluating the merged  
293 and integrated scRNAseq profiles, thereby not only allowing cross-species comparison but  
294 also increasing the dimensionality of assessed MOL per species. Indeed, k-nearest neighbor  
295 (KNN) clustering identified five potential subpopulations of MOL (labelled as clusters 0, 1, 2, 3  
296 and 4 in **Figure 4a-c**). Notably, all subpopulations displayed approximately similar expression  
297 levels of marker genes encoding structural myelin proteins (*PLP1*, *MBP*, *CNP*, *CLDN11*, *MAG*)  
298 (**Figure 4b**). However, the subpopulations were defined by varying degrees of expression of  
299 other transcripts, including the myelin-related *CD9* and *OPALIN* (cluster 0), *APOD*, *KLK6* and  
300 *S100B* (cluster 1), *APOE* and *CST3* (cluster 2), *CA2* and *PTGS* (cluster 3), and *SIRT2* and  
301 *NFASC* (cluster 4) (**Figure 4b**). Considering the larger number of evaluated cells compared to  
302 the prior individual studies on which the present assessment is based, these findings support  
303 the previously identified subpopulations of MOL<sup>17,29</sup>. Based on gene ontology (GO) term  
304 enrichment analysis of biological processes (**Figure 4-supplement 1**), one may speculate that  
305 MOL in clusters 2, 3 and 4 are associated with GO terms grouped as protein synthesis, electron

306 transport and immune activation, respectively. However, their functional specialization and  
307 relevance remain to be shown. Less speculatively, both human and mouse MOL comprise all  
308 five subpopulations to an approximately similar extent (**Figure 4c**), implying that none of these  
309 MOL subpopulations is restricted to either one of these species.

310

311

## 312 **Discussion**

313

314 We performed quantitative proteome analysis to determine the protein composition of human  
315 CNS myelin. Subjecting myelin biochemically purified from human subcortical white matter to  
316 label-free mass spectrometry allowed identifying hundreds of proteins with very high  
317 confidence. More importantly, the method involves quantifying peptide intensities without  
318 prefractionation, thereby providing direct information about the relative abundance of myelin  
319 proteins. The latter provides a considerable advancement compared to previous approaches  
320 involving prefractionation at the protein level via 1D-gels<sup>24,34</sup> or at the peptide level via 2D-  
321 liquid chromatography<sup>35,36</sup>, which yielded lists of proteins identified in human CNS myelin but  
322 without information about their relative abundance.

323

324 Knowing the relative abundance of myelin proteins enables both considering their  
325 stoichiometric relationships and cross-species comparisons. For example, the filament-  
326 forming septins SEPTIN2, SEPTIN4, SEPTIN7 and SEPTIN8 displayed a molar stoichiometry  
327 of about 1:1:2:2 in human CNS myelin. Notably, the same septin subunits are also comprised  
328 in myelin of mice with a similar molar stoichiometry<sup>9</sup>, a likely prerequisite for their assembly  
329 into similar core multimers and higher order structures. Indeed, experiments in mice have  
330 previously shown that these septin subunits assemble into membrane-associated filaments  
331 that stabilize the adaxonal compartment of CNS myelin<sup>37</sup>. Integrating the current view on  
332 septin assembly<sup>38</sup> and the relative abundance of septin subunits in myelin it is possible to  
333 deduce that the predominant core multimer in myelin is a hexamer of septins 2/4-8-7-7-8-2/4.  
334 The comparatively low abundance of SEPTIN9 in myelin implies that core octamers occur less  
335 frequently. Assessing the relative abundance of myelin proteins also allows deducing that for  
336 each core hexamer up to one molecule of the adaptor protein anillin that facilitates septin  
337 assembly<sup>39</sup> is present in CNS myelin. Together, the relative abundance and multimer  
338 composition of myelin septins emerges as conserved between human and mouse CNS myelin,  
339 similar to that of other structural myelin proteins, including PLP, MBP and CNP.

340

341 On the other hand, we also found considerable qualitative and quantitative differences  
342 between the protein composition of human and mouse CNS myelin. For example, the  
343 tetraspan-transmembrane proteins TSPAN2<sup>40-42</sup> and GPM6B/M6B/Rhombex29<sup>43,44</sup> were  
344 previously established as myelin proteins in mice and rats, and they were readily identified in  
345 CNS myelin of mice by both mass spectrometry<sup>9</sup> and immunoblot. However, these proteins  
346 were of very low abundance or virtually undetectable in human myelin by both techniques. It  
347 has been established in experimental mice that TSPAN2 and GPM6B contribute to  
348 immunomodulation<sup>42</sup> and myelin biogenesis<sup>44</sup>, respectively. The present data thus imply that

349 the mouse and human orthologs do not contribute equally to these functions. The gap junction  
350 protein GJC3/CX29 has also been established as a myelin protein in mice and rats and is  
351 thought to mediate intercellular coupling via gap junctions <sup>45,46</sup>. Similar to TSPAN2 and  
352 GPM6B, GJC3 has been readily identified mass spectrometrically and by immunoblotting in  
353 mouse but not human myelin. Interestingly, though, deletion of the *Gjc3*-gene in mice did not  
354 have evident morphological or functional consequences for CNS myelin or oligodendrocytes  
355 <sup>47,48</sup>. The benefit for mouse CNS myelin to comprise GJC3 thus remains unknown at this time.  
356

357 On the other hand, peripheral myelin protein 2 (PMP2, previously termed P2 or FABP8), a  
358 membrane-phosphoinositide-binding protein <sup>49</sup>, has long been known as a constituent of  
359 peripheral myelin generated by Schwann cells in the PNS <sup>21,50,51</sup> and actually considered a  
360 marker to discriminate peripheral from central myelin <sup>8,52,53</sup>. Notably, the experiments  
361 establishing this view involved bovine and rodent but not human samples. Our finding that  
362 PMP2 is a myelin protein in the human CNS leaves open the question of whether this reflects  
363 clade-specific *de novo* recruitment into CNS myelin or selective constraints that eliminated  
364 PMP2 from myelin in the clade including cows and rodents. At the evolutionary level, it is  
365 interesting to speculate which benefits (if any) human myelin may have from comprising PMP2,  
366 or what the evolutionary constraints may be that led to its dropout from rodent CNS myelin. A  
367 lead may come from the investigation of the PNS of *Pmp2*-deficient mice, which displayed an  
368 altered myelin lipid profile associated with reduced motor nerve conduction velocity <sup>54</sup>. It is  
369 tempting to speculate that presence of PMP2 in human but not mouse CNS myelin may affect  
370 the composition or organization of its lipids, and, possibly, conduction velocity. The *PMP2* gene  
371 causes – when mutated – the peripheral neuropathy Charcot-Marie-Tooth (CMT) disease type  
372 1G <sup>55,56</sup>. A subset of these patients has been tested by brain MRI; however, no major pathology  
373 of the white matter was found that would be typical of a leukodystrophy <sup>55</sup>. Yet, our finding that  
374 PMP2 is a myelin protein in the human CNS indicates that further testing these and other  
375 CMT1G patients for central involvement may find yet-overlooked impairments, possibly more  
376 subtle than visible by MRI.

377  
378 How may species-dependent differences in myelin protein composition come about at the  
379 molecular level? Considering the limitations imposed by the availability of human samples, we  
380 can not formally rule out that differences in the sex or age of specimen, brain region, sample  
381 preparation or data analysis may affect the degree of correlation. However, we note that both  
382 male and female donors are represented in the human samples, and that machinery,  
383 methodology and data analysis were the same in establishing the mouse myelin proteome <sup>9</sup>  
384 and the human myelin proteome assessed here. The *post mortem*-delay unavoidable for  
385 sampling human specimen is unlikely to affect the present comparison when considering that

386 the average *post mortem*-delay is six hours at the Netherlands brain bank that supplied the  
387 human samples used here and that an experimental *post mortem*-delay of six hours did not  
388 considerably affect the myelin proteome in C57Bl/6N mice <sup>9</sup>. Finally, we believe that the high  
389 degree of cross-species similarity regarding the abundance of structural myelin proteins  
390 between humans and mice allows trust in the overall comparison of myelin protein  
391 composition, including for proteins displaying cross-species dissimilarity. Thus, individual  
392 myelin proteins displaying species-dependent differences may be owing to species-dependent  
393 differences in intracellular trafficking and incorporation into the myelin sheath, stability and  
394 turnover rate, mRNA-to-protein translation efficiency, or actual mRNA expression.

395  
396 Indeed, our cross-species integration and comparison of the scRNAseq profiles of mature  
397 oligodendrocytes (MOL) implies that species-dependent mRNA expression can explain the  
398 species-dependent differences in myelin protein composition at least to some extent. For  
399 example, *PMP2/Pmp2* mRNA is expressed in human but not mouse MOL and PMP2 protein  
400 was identified in human but not mouse myelin. *Vice versa*, *TSPAN2/Tspan2* and *GJC3/Gjc3*  
401 transcripts are expressed in mouse but not human MOL and their protein products TSPAN2  
402 and GJC3 are identified in mouse but not human myelin. Less exclusively, *CA2/Car2* mRNA  
403 is preferentially expressed in mouse compared to human MOL, correlating with the relative  
404 abundance of its protein product CAR2/CA2 in mouse compared to human myelin. *Vice versa*,  
405 the higher abundance of PADI2 in human compared to mouse myelin goes along with a higher  
406 abundance of *PADI2/Padi2* mRNA in human compared to mouse MOL. Together, species-  
407 dependent protein abundance in myelin is probably owing to species-dependent mRNA  
408 expression, at least for some myelin constituents. We speculate that the evolutionary  
409 emergence of regulatory elements that regulate oligodendroglial gene expression in the  
410 hominin clade <sup>57</sup> partly underlies speciation of oligodendroglial transcript profiles and myelin  
411 protein composition. However, evolutionary changes may also affect oligodendroglial gene  
412 regulation specifically in the rodent clade.

413  
414 It is of note that not all myelin constituents display an evident cross-species correlation  
415 between the abundance of its transcript in myelinating oligodendrocytes and the abundance  
416 of the protein product in myelin. Examples include the tetraspanin CD9/TSPAN9 <sup>41,58</sup>, which  
417 is more abundant in human compared to mouse myelin, and the enzyme aspartoacylase  
418 (ASPA) <sup>59</sup>, which is more abundant in mouse compared to human myelin. Indeed, the  
419 abundance of the transcripts encoding either protein are approximately similar when  
420 comparing human and mouse MOL. This indicates that not all differences in the protein  
421 composition of human and mouse myelin are caused by species-dependent differences in  
422 gene expression by MOL. Instead, the efficiency of mRNA translation, intracellular trafficking,

423 incorporation into myelin, stability or turnover rate of myelin proteins may display species-  
424 dependent efficiency.

425

426 In conclusion, both oligodendroglial mRNA abundance profiles and the CNS myelin proteome  
427 display widespread similarities between humans and mice, suggesting considerable  
428 evolutionary conservation. However, distinct molecular differences were evident, indicating  
429 evolutionary recruitment or dropout of myelin proteins across mammalian clades. Mice are  
430 commonly assessed as a model for humans in myelin biology. Considering the evolutionary  
431 heterogeneity of oligodendroglial mRNA expression and myelin composition can be instructive  
432 when translating between mouse models and humans.

433

434



435 **Methods**

436

437 **Human samples**

438 Post-mortem brain tissue was provided by the Netherlands Brain Bank. Donors gave informed  
439 consent to perform autopsy and for the use of clinical and pathological information by  
440 researchers, approved by the medical ethics committee of the VU medical center (Amsterdam,  
441 The Netherlands). The diagnoses were confirmed by a neuropathologist.

442

443 The following subjects were used for myelin purification and proteome analysis of lysate (L)  
444 and purified myelin (M) as well as for immunoblotting.

| Subject  | Sex    | Age (years) | Diagnosis            | PMD (hours) | Brain region | Sample name in mass spectrometry |
|----------|--------|-------------|----------------------|-------------|--------------|----------------------------------|
| 1995-106 | male   | 74          | Non-demented control | 08:00       | White matter | Control_L1/2<br>Control_M1/2     |
| 1996-052 | male   | 73          | Non-demented control | 09:10       | White matter | Control_L3/4<br>Control_M3/4     |
| 2002-024 | female | 75          | Non-demented control | 05:30       | White matter | Control_L5/6<br>Control_M5/6     |
| 2010-015 | female | 73          | Non-demented control | 07:45       | White matter | Control_L7/8<br>Control_M7/8     |
| 2017-124 | female | 55          | Non-demented control | 07:30       | White matter | Control_L9/10<br>Control_M9/10   |

445

446 The following subjects were used for immunohistochemical analysis:

| Subject  | Sex    | Age (years) | Diagnosis            | PMD (hours) | Brain Region | Comments                                                                                 |
|----------|--------|-------------|----------------------|-------------|--------------|------------------------------------------------------------------------------------------|
| 2019-026 | male   | 55          | Parkinson Disease    | 05:55       | Optic nerve  | No pathology of the optic nerve                                                          |
| 2019-077 | female | 91          | Non-demented control | 09:30       | Optic nerve  | Immunolabeled section shown in <b>Figure 2-supplement 1</b> originates from this subject |
| 2019-106 | female | 80          | Non-demented control | 06:50       | Optic nerve  | -                                                                                        |

447

448 **Animal welfare**

449 For the procedure of sacrificing vertebrates for preparation of tissue, all regulations given in  
450 the German animal welfare law (TierSchG §4) are followed. Since sacrificing of vertebrates is  
451 not an experiment on animals according to §7 Abs. 2 Satz 3 TierSchG, no specific ethical  
452 review and approval or notification is required for the present work. All procedures were

453 supervised by the animal welfare officer and the animal welfare committee for the Max Planck  
454 Institute of Experimental Medicine, Göttingen, Germany. The animal facility at the Max Planck  
455 Institute of Experimental Medicine is registered according to §11 Abs. 1 TierSchG.

456

#### 457 **Myelin purification**

458 A light-weight membrane fraction enriched for myelin was purified from pieces of normal  
459 appearing white matter of human subjects post-mortem as specified above, brains of C57Bl/6N  
460 mice, and sciatic nerves of C57Bl/6N mice using an established protocol involving two steps  
461 of sucrose density gradient centrifugation and osmotic shocks<sup>60</sup>. Myelin accumulates at the  
462 interface between 0.32 M and 0.85 M sucrose.

463

#### 464 **Electron microscopy of purified myelin**

465 For assessment of the human myelin fraction by electron microscopy, myelin purified from the  
466 white matter of subjects 1995-106 and 1996-052 was used. 75µl of each myelin sample was  
467 mixed with 75µl 2x concentrated fixative composed of 5% glutaraldehyde, 8% formaldehyde  
468 and 1.0% NaCl in 100 mM phosphate buffer pH 7.3. Then the fixed fraction was spun down  
469 and resuspended in 2% agarose Super LM (Roth, Karlsruhe, Germany). After solidification the  
470 pellet was cut into two halves and embedded in Epon after postfixation in 2% OsO<sub>4</sub>. Ultrathin  
471 sections across the pellet were prepared using an UC7 ultramicrotome (Leica Microsystems,  
472 Vienna, Austria) equipped with a 35° diamond knife (Diatome, Biel, Switzerland). Images were  
473 taken with a LEO912 transmission electron microscope (Carl Zeiss Microscopy, Oberkochen,  
474 Germany) using a 2k on-axis CCD camera (TRS, Moorenweis, Germany).

475

#### 476 **Label-free quantification of myelin proteins**

477 In-solution digestion of myelin proteins according to an automated filter-aided sample  
478 preparation (FASP) protocol<sup>60</sup> and LC-MS-analysis by different MS<sup>E</sup>-type data-independent  
479 acquisition (DIA) mass spectrometry approaches was performed as recently established for  
480 mouse PNS<sup>61</sup> and CNS<sup>9</sup> myelin. Briefly, protein fractions corresponding to 10 µg myelin  
481 protein were dissolved in lysis buffer (1% ASB-14, 7 M urea, 2 M thiourea, 10 mM DTT, 0.1 M  
482 Tris pH 8.5) and processed according to a CHAPS-based FASP protocol in centrifugal filter  
483 units (30 kDa MWCO, Merck Millipore). After removal of the detergents, protein alkylation with  
484 iodoacetamide, and buffer exchange to digestion buffer (50 mM ammonium bicarbonate  
485 (ABC), 10 % acetonitrile), proteins were digested overnight at 37°C with 400 ng trypsin. Tryptic  
486 peptides were recovered by centrifugation and extracted with 40 µl of 50 mM ABC and 40 µl  
487 of 1% trifluoroacetic acid (TFA), respectively. Combined flow-throughs were directly subjected  
488 to LC-MS-analysis. For quantification according to the TOP3 approach<sup>19</sup>, aliquots were spiked

489 with 10 fmol/ $\mu$ l of Hi3 EColi standard (Waters Corporation), containing a set of quantified  
490 synthetic peptides derived from the *E. coli* chaperone protein ClpB.

491

492 Nanoscale reversed-phase UPLC separation of tryptic peptides was performed with a  
493 nanoAcquity UPLC system equipped with a Symmetry C18 5  $\mu$ m, 180  $\mu$ m  $\times$  20 mm trap column  
494 and a HSS T3 C18 1.8  $\mu$ m, 75  $\mu$ m  $\times$  250 mm analytical column (Waters Corporation)  
495 maintained at 45°C. Peptides were separated over 120 min at a flow rate of 300 nl/min with a  
496 gradient comprising two linear steps of 3-35% mobile phase B (acetonitrile containing 0.1%  
497 formic acid) in 105 min and 35-60% mobile phase B in 15 min, respectively. Mass  
498 spectrometric analysis on a quadrupole time-of-flight mass spectrometer with ion mobility  
499 option (Synapt G2-S, Waters Corporation) was performed in the ion mobility-enhanced DIA  
500 mode with drift time-specific collision energies referred to as UDMS<sup>E</sup> <sup>62</sup>. As established  
501 previously for proteome analysis of purified mouse myelin <sup>9,61</sup>, samples were re-run in a data  
502 acquisition mode without ion mobility separation of peptides (referred to as MS<sup>E</sup>) to ensure the  
503 correct quantification of exceptionally abundant myelin proteins. Continuum LC-MS data were  
504 processed using Waters ProteinLynx Global Server (PLGS) and searched against a custom  
505 database compiled by adding the sequence information for *E. coli* chaperone protein ClpB and  
506 porcine trypsin to the UniProtKB/Swiss-Prot human proteome (release 2019-10, 20379  
507 entries) and by appending the reversed sequence of each entry to enable the determination of  
508 false discovery rate (FDR). Precursor and fragment ion mass tolerances were automatically  
509 determined by PLGS and were typically below 5 ppm for precursor ions and below 10 ppm  
510 (root mean square) for fragment ions. Carbamidomethylation of cysteine was specified as fixed  
511 and oxidation of methionine as variable modification. One missed trypsin cleavage was  
512 allowed. Minimal ion matching requirements were two fragments per peptide, five fragments  
513 per protein and one peptide per protein. FDR for protein identification was set to 1% threshold.

514  
515 For post-identification analysis including TOP3 quantification of proteins, ISOQuant <sup>62</sup>;  
516 software freely available at [www.isoquant.net](http://www.isoquant.net)) was used as described previously <sup>9,61</sup>. Only  
517 proteins represented by at least two peptides (minimum length six amino acids, score  $\geq$  5.5,  
518 identified in at least two runs) were quantified as parts per million (ppm), i.e. the relative amount  
519 (w/w) of each protein in respect to the sum over all detected proteins. FDR for both peptides  
520 and proteins was set to 1% threshold and at least one unique peptide was required. Human  
521 myelin fractions and the corresponding white matter homogenates were assessed as five  
522 biological replicates (n = 5) each. The proteome analysis was repeated as an independent  
523 replicate experiment from the same protein fractions, resulting in ten LC-MS runs per condition.  
524 The mass spectrometry proteomics data have been deposited to the ProteomeXchange  
525 Consortium via the PRIDE <sup>63</sup> partner repository with dataset identifier PXD029727.

526

## 527 **Visualization of proteomic data**

528 Proteomic data were visualized and analyzed as in <sup>9,61</sup>. In more detail, heatmaps and scatter  
529 plots were prepared in Microsoft Excel 2016 and GraphPad Prism 9. The area-proportional  
530 Venn diagram was prepared using BioVenn <sup>64</sup>.

531

## 532 **Gel electrophoresis and silver staining of gels**

533 Protein concentrations were determined using the DC Protein Assay kit (BioRad, Hercules,  
534 CA, USA). Samples were diluted in 1 x SDS sample buffer with dithiothreitol and separated on  
535 a 12% SDS-PAGE for 1 hr at 200 V using the BioRad system; gels were fixated overnight in  
536 10% [v/v] acetic acid / 40% [v/v] ethanol, and then washed in 30% ethanol (2 x 20 min) and  
537 ddH<sub>2</sub>O (1 x 20 min). For sensitization, gels were incubated 1 min in 0.012% [v/v] Na<sub>2</sub>S<sub>2</sub>O<sub>3</sub> and  
538 subsequently washed with ddH<sub>2</sub>O (3 x 20 s). For silver staining, gels were impregnated for 20  
539 min in 0.2% [w/v] AgNO<sub>3</sub>/ 0.04% formaldehyde, washed with ddH<sub>2</sub>O (3 x 20 s) and developed  
540 in 3% [w/v] Na<sub>2</sub>CO<sub>3</sub>/ 0.02% [w/v] formaldehyde. The reaction was stopped by exchanging the  
541 solution with 5% [v/v] acetic acid. Gels were kept in ddH<sub>2</sub>O until documentation.

542

## 543 **Immunoblotting**

544 Immunoblotting was performed as described <sup>37</sup>. Primary antibodies were specific for connexin-  
545 29 (GJC3, Invitrogen 34-4200, 1:500), tetraspanin-2 (TSPAN2, ProteinTech #20463-1-AP,  
546 1:500), aspartoacylase (ASPA, ProteinTech #13244-1-AP, 1:500), tetraspanin-28 (CD81, BD  
547 Biosciences-US #559517, 1:500), sirtuin 2 (SIRT2, Abcam #ab67299, 1:500), immunoglobulin  
548 superfamily member 8 (IGSF8, ThermoScientific #PA5-71693, 1:500), carbonic anhydrase  
549 (CA2, kind gift from Said Ghandour, 1:1000), myelin-associated oligodendrocyte basic protein  
550 (MOBP, LS-Bio #LS-C164262/43727, 1:500), myelin basic protein (MBP, Serotec #PO2687,  
551 1:500), cyclic nucleotide phosphodiesterase (CNP, Sigma #SAB1405637, 1:1000), proteolipid  
552 protein (PLP/DM20, A431, kind gift from Martin Jung, 1:5000), myelin-associated glycoprotein  
553 (MAG, clone 513, Chemicon #MAB1567, 1:500), myelin oligodendrocyte glycoprotein (MOG,  
554 clone 8-18C5, kind gift from Christopher Linington 1:500), claudin-11 (CLDN11, Abcam  
555 #ab53041, 1:500), protein-arginine deiminase 2 (PADI2, Proteintech #12110-1-AP, 1:1000),  
556 tetraspanin-29 (CD9, Abcam #ab92726, 1:500), alpha-crystallin B chain (CRYAB, ProteinTech  
557 #15808-1-AP, 1:500), peripheral myelin protein 2 (PMP2, ProteinTech #12717-1-AP, 1:500).  
558 Appropriate secondary anti-mouse or anti-rabbit antibodies conjugated to HRP were from  
559 Dianova (HRP goat-anti-mouse, #115-035-003, 1:5000; HRP goat-anti-rabbit, #111-035-003,  
560 1:5000; HRP goat-anti-rat, #112-035-167, 1:5000). Immunoblots were developed using the  
561 Enhanced Chemiluminescence Detection kit (Western Lightning Plus, Perkin Elmer, Waltham,  
562 Massachusetts, USA) and the Super Signal™ West Femto Maximum Sensitivity Substrate

563 (Thermo Fisher Scientific, Rockford, Illinois, USA). Signal was detected using the Intas  
564 ChemoCam system (INTAS Science Imaging Instruments GmbH, Göttingen, Germany).  
565 Original immunoblots are provided in **Figure 2-source data 1**.

566

### 567 **Immunohistochemistry**

568 Paraffinized human optic nerves were cut in 5  $\mu\text{m}$  sections using the microtome RM2155  
569 (Leica, Wetzlar, Germany) and placed on 1 mm thick microscope slides (Marienfeld,  
570 #1000000, Lauda/Königshofen, Germany). Immunolabelling of the paraffinized cross sections  
571 was performed as follows: sections were incubated for 10 min at 60°C, deparaffinized in a  
572 series of incubations in xylol, xylol, xylol/isopropanol (1:1 ratio) for 10 min each, incubated in  
573 a series of steps in decreasing ethanol concentration (100%, 90%, 70%, 50%) for 5 min each,  
574 and finally washed in ddH<sub>2</sub>O for 5 min. Afterwards, the sections were incubated for 5 min in  
575 0.01 M citrate buffer (pH 6.0). Then, the sections with citrate buffer were microwaved at 600  
576 W for 10 min. Finally, the slides were left to cool down, rinsed 1 x 5 min with 0.05 M Tris buffer  
577 (pH 7.6) containing 2% milk powder, and then blocked with 10% goat serum  
578 (Gibco/ThermoFisher Scientific #16210064, Waltham, Massachusetts, USA) diluted 1:4 in  
579 PBS (pH 7.4)/ 1% BSA. Primary antibodies were diluted in PBS/BSA and applied over night at  
580 4°C. Samples were washed 3 x 5 min in Tris buffer with 2% milk powder (Frema Instant  
581 Magermilchpulver, granoVita, Radolfzell, Germany). Secondary antibodies were applied in  
582 incubation buffer (1:500 in PBS/BSA) with 4',6-diamidino-2-phenylindole (DAPI, ThermoFisher  
583 Scientific, Waltham, Massachusetts, USA, 1:2000). Slides were then rinsed 1 x 5 min with Tris  
584 buffer without milk powder and mounted using Aqua-Poly/Mount (Polysciences, Eppelheim,  
585 Germany). Antibodies were specific for peripheral myelin protein (PMP2; ProteinTech #12717-  
586 1-AP; 1:200) and human  $\beta$ -Tubulin 3 (TUJ1; BioLegends #MMS-435P; 1:500). Secondary  
587 antibodies were donkey-anti-mouse Alexa 555 (Invitrogen #A31570, 1:1000) and goat anti-  
588 rabbit Dylight 633 (Invitrogen #35562, 1:500). The labeled sections were imaged using the  
589 confocal microscope LSM880 (Zeiss, Oberkochen, Germany). The signal was collected with  
590 the objective Plan-Apochromat 40x/1.4 Oil DIC M27 using oil (Immerso<sup>TM</sup> 518 F, Zeiss,  
591 Oberkochen, Germany) and an additional zoom of 1.5. To observe the samples with the light  
592 source Colibri (Zeiss, Oberkochen, Germany), a FS90 filter was used. DAPI was excited at  
593 405 and signal was collected between 431 nm – 495 nm. Alexa 555 was excited with a DPSS  
594 561-10 laser at an excitation of 561 nm and signal was collected between 571 nm – 615 nm.  
595 Then, Dylight 633 was excited with a HeNe633 laser at an excitation of 633 nm and an  
596 emission between 647 nm – 687 nm. Finally, the MBS 488/561/633 beam splitter was used to  
597 detect Alexa 555 and Dylight 633 and MBS-405 for DAPI respectively. Images were processed  
598 with ImageJ software.

599



## 600 **Retrieval of publicly available scRNA-seq datasets**

601 Eight mouse and six human scRNA-seq datasets published between 2015 and early 2020  
602 were collected for transcriptome analysis. Datasets were selected based on the number of  
603 cells designated as oligodendrocytes, and the reported health condition of specimen. Dataset  
604 expression matrices and, if available, corresponding metadata, were recovered for mouse  
605 datasets GSE60361<sup>32</sup>, GSE775330<sup>29</sup>, GSE113973<sup>16</sup>, GSE116470<sup>30</sup>, SRP135960<sup>31</sup>,  
606 GSE129788<sup>33</sup>, GSE130119<sup>28</sup>, and GSE140511<sup>18</sup>. Human scRNA datasets were retrieved for  
607 the Single Cell Portal DroNC-Seq human archived brain<sup>26</sup>, GSE97930<sup>25</sup>, GSE138852<sup>27</sup>,  
608 GSE118257<sup>17,28</sup>, GSE130119<sup>28</sup>, and syn21125841<sup>18</sup>. For quality control, each of the retrieved  
609 datasets was analyzed using the Seurat R package (Version 3.1.4)<sup>65</sup> in an analysis pipeline  
610 including validating sequencing quality, filtering for outlier cells (as specified in **Figure 3-**  
611 **source data 1**), log-normalizing the expression matrix with a scale factor 10,000, high variable  
612 gene selection and data scaling, linear dimensionality reduction using principal component  
613 analysis (PCA), and neighboring embedding using uniform manifold approximation and  
614 projection (UMAP) to ensure accurate cell type annotation and to detect any potential batch  
615 effect. Marker genes used for annotating the oligodendrocyte lineage were *CSPG4*, *PCDH15*,  
616 *PDGFRa*, *PTPRZ1* and *VCAN* for OPCs, *BCAS1*, *ENPP6* and *GPR17* for NFO, and *CA2*,  
617 *CLDN11*, *CNP*, *CMTM5*, *MAG*, *MBP*, *MOBP*, *PLP1* and *SIRT2* for MOL. Specific parameters  
618 applied to individual datasets and the number of recovered cells are listed in **Figure 3-source**  
619 **data 1**.

## 620 **Merging and integration of scRNA-seq profiles of human and mouse MOL**

621 Cells designated as MOL were subset from each dataset and focused for downstream  
622 analysis. Before merging human and mouse datasets, 16,255 mouse gene symbols were  
623 translated into human gene symbols using a reference gene list from Mouse Genome  
624 Informatics (The Jackson Laboratory; retrieved from  
625 [www.informatics.jax.org/downloads/reports/HOM\\_MouseHumanSequence.rpt](http://www.informatics.jax.org/downloads/reports/HOM_MouseHumanSequence.rpt) on 28.10.2020;  
626 The Jackson Laboratory; Version 6.16). 32,952 additional mouse gene symbols were  
627 translated into human gene symbols by capitalizing the lettering. Gene symbol synchronized  
628 human and mouse MOL profiles were first merged and proceeded with the general analysis  
629 pipeline for identifying possible batch effects. Principal component analysis was performed  
630 using the top 2,000 most variable genes, and UMAP analysis was performed with the top 20  
631 principal components (PCs); the results implied that the different studies introduced the largest  
632 variability for data separation. For integrating all selected human and mouse datasets, the  
633 SCTransform<sup>66</sup> pipeline implemented in Seurat was applied. Each dataset underwent  
634 SCTransform normalization, and all datasets were integrated using 3,000 identified integration  
635 features. Principal component analysis was conducted downstream and UMAP calculation  
636



637 was performed using the first 20 PCs. Cluster analysis was based on the k-nearest neighbors  
638 (KNN) algorithm calculated with resolution 0.1, and clusters of differentially expressed genes  
639 were calculated using the model-based analysis of single-cell transcriptomics (MAST)  
640 algorithm (**Figure 4-source data 1**).

641  
642 **Human and mouse transcriptome correlation analysis**  
643 Transcriptome correlation analysis of human and mouse MOL scRNA-seq profiles was  
644 performed using the van der Waerden (vdW) score-transformed average expression of  
645 integration features (n = 3,000) in each dataset. Subsequently, human and mouse gene  
646 average vdW scores were visualized using scatter plot (in **Figure 3-supplement 2**); Pearson  
647 correlation was calculated for annotated known myelin genes and all genes, respectively.

648  
649 **Gene ontology enrichment analysis**  
650 The resulting cluster marker gene lists were input for gene ontology (GO) enrichment analysis  
651 to detect potential regulated biological processes terms using the gprofiler2 R package  
652 (Version 0.2.0)<sup>67</sup>. GO terms with an FDR-corrected P < 0.05 were considered as enriched and  
653 visualized using EnrichmentMap and AutoAnnotate plugins in Cytoscape (Version 3.8.2)<sup>68-70</sup>

654  
655 **Statistics and reproducibility**  
656 Pie charts, heatmaps and scatter plots were prepared in Microsoft Excel 2016 and GraphPad  
657 Prism 9. For the scatter plots, Pearson correlation and regression line were calculated via  
658 GraphPad Prism 9. Relative sample proteomic profile distances were evaluated using  
659 Pearson's correlation based on log2 transformed ppm values. scRNA-seq cluster marker  
660 analysis was conducted using MAST algorithm. Data analysis and visualization was performed  
661 using GraphPad Prism 9 and R software.

662  
663 **Data availability statement**  
664 The mass spectrometry proteomics data for human myelin are supplied as **Figure 1-source**  
665 **data 1** and have been deposited to the ProteomeXchange Consortium via the PRIDE<sup>63</sup> partner  
666 repository with dataset identifier PXD029727. The utilized publicly available mass  
667 spectrometry proteomics data for mouse myelin are available at the ProteomeXchange  
668 Consortium PRIDE partner repository with dataset identifier PXD020007. Identifiers of utilized  
669 publicly available scRNA-seq datasets are given in **Figure 2-source data 1**.

670  
671 **Code availability statement**  
672 Code can be accessed at [https://github.com/TSun-tech/Gargareta\\_etal](https://github.com/TSun-tech/Gargareta_etal)  
673  
674

675 **References**

676

- 677 1. Nave, K.-A. & Werner, H. B. Myelination of the Nervous System: Mechanisms and  
678 Functions. *Annual Review of Cell and Developmental Biology* **30**, 503–533 (2014).
- 679 2. Stadelmann, C., Timmler, S., Barrantes-Freer, A. & Simons, M. Myelin in the Central  
680 Nervous System: Structure, Function, and Pathology. *Physiol Rev* **99**, 1381–1431 (2019).
- 681 3. Duncan, I. D., Hammang, J. P. & Trapp, B. D. Abnormal compact myelin in the myelin-  
682 deficient rat: absence of proteolipid protein correlates with a defect in the intraperiod line.  
683 *Proceedings of the National Academy of Sciences* **84**, 6287–6291 (1987).
- 684 4. Popko, B. *et al.* Myelin deficient mice: Expression of myelin basic protein and generation  
685 of mice with varying levels of myelin. *Cell* **48**, 713–721 (1987).
- 686 5. Edgar, J. M. *et al.* Early ultrastructural defects of axons and axon–glia junctions in mice  
687 lacking expression of Cnp1. *Glia* **57**, 1815–1824 (2009).
- 688 6. Snaidero, N. *et al.* Antagonistic Functions of MBP and CNP Establish Cytosolic Channels  
689 in CNS Myelin. *CellReports* **18**, 314–323 (2017).
- 690 7. Morell, P., Lipkind, R. & Greenfield, S. Protein composition of myelin from brain and spinal  
691 cord of several species. *Brain Research* **58**, 510–514 (1973).
- 692 8. Franz, T., Waehneltd, T. v, Neuhoff, V. & Wächtler, K. Central Nervous System Myelin  
693 Proteins and Glycoproteins in Vertebrates: a Phylogenetic Study. *Brain Research* **226**,  
694 245–258 (1981).
- 695 9. Jahn, O. *et al.* The CNS Myelin Proteome: Deep Profile and Persistence After Post-  
696 mortem Delay. *Frontiers in Cellular Neuroscience* **14**, (2020).
- 697 10. Ackerman, S. D. & Monk, K. R. The scales and tales of myelination: using zebrafish and  
698 mouse to study myelinating glia. *Brain Research* vol. 1641 79–91 (2016).
- 699 11. Ravi, V. & Venkatesh, B. The Divergent Genomes of Teleosts. *Annual Review of Animal*  
700 *Bioscience* **6**, 47–68 (2017).
- 701 12. Yoshida, M. & Colman, D. R. Parallel Evolution and Coexpression of the Proteolipid  
702 Proteins and Protein Zero in Vertebrate Myelin. *Neuron* **16**, 1115–1126 (1996).
- 703 13. Siems, S. B. *et al.* Proteome Profile of Myelin in the Zebrafish Brain. *Frontiers in Cell and*  
704 *Developmental Biology* **9**, (2021).
- 705 14. Yang, S. *et al.* Patterns of insertions and their covariation with substitutions in the rat,  
706 mouse, and human genomes. *Genome Research* **14**, 517–527 (2004).
- 707 15. Yeung, M. S. Y. *et al.* Dynamics of oligodendrocyte generation in multiple sclerosis. *Nature*  
708 **566**, 538–542 (2019).
- 709 16. Falcão, A. M. *et al.* Disease-specific oligodendrocyte lineage cells arise in multiple  
710 sclerosis. *Nature Medicine* **24**, 1837–1844 (2018).
- 711 17. Jäkel, S. *et al.* Altered human oligodendrocyte heterogeneity in multiple sclerosis. *Nature*  
712 **566**, 543–547 (2019).
- 713 18. Zhou, Y. *et al.* Human and mouse single-nucleus transcriptomics reveal TREM2-  
714 dependent and TREM2-independent cellular responses in Alzheimer’s disease. *Nature*  
715 *Medicine* **26**, 131–142 (2020).
- 716 19. Silva, J. C., Gorenstein, M. v., Li, G. Z., Vissers, J. P. C. & Geromanos, S. J. Absolute  
717 quantification of proteins by LCMSE: A virtue of parallel MS acquisition. *Molecular and*  
718 *Cellular Proteomics* **5**, 144–156 (2006).
- 719 20. Greenfield, S., Brostoff, S., Eylar, E. H. & Morell, P. Protein Composition of Myelin of the  
720 Peripheral Nervous System. *Journal of Neurochemistry* **20**, 1207–1216 (1973).
- 721 21. Uusitalo, M. *et al.* Human myelin protein P2: from crystallography to time-lapse membrane  
722 imaging and neuropathy-associated variants. *The FEBS Journal* (2021)  
723 doi:10.1111/febs.16079.
- 724 22. Campagnoni, A. T. Molecular Biology of Myelin Proteins from the Central Nervous System.  
725 *The Journal of Neurochemistry* **51**, 1–14 (1988).
- 726 23. Waehneltd, T. v & Malotka, J. Comparative electrophoretic study of the wolfram proteins  
727 in myelin from several mammalia. *Brain Research* **189**, 582–587 (1980).
- 728 24. Ishii, A. *et al.* Human myelin proteome and comparative analysis with mouse myelin.  
729 *PNAS* **106**, 14605–14610 (2009).
- 730 25. Lake, B. B. *et al.* Integrative single-cell analysis of transcriptional and epigenetic states in  
731 the human adult brain. *Nature Biotechnology* **36**, 70–80 (2018).

- 732 26. Habib, N. *et al.* Massively parallel single-nucleus RNA-seq with DroNc-seq. *Nature*  
733 *Methods* **14**, 955–958 (2017).
- 734 27. Grubman, A. *et al.* A single-cell atlas of entorhinal cortex from individuals with Alzheimer's  
735 disease reveals cell-type-specific gene expression regulation. *Nature Neuroscience* **22**,  
736 2087–2097 (2019).
- 737 28. Wheeler, M. A. *et al.* MAFG-driven astrocytes promote CNS inflammation. *Nature* **578**,  
738 593–599 (2020).
- 739 29. Marques, S. *et al.* Oligodendrocyte heterogeneity in the mouse juvenile and adult central  
740 nervous system. *Science* **352**, 1326–1329 (2016).
- 741 30. Saunders, A. *et al.* Molecular Diversity and Specializations among the Cells of the Adult  
742 Mouse Brain. *Cell* **174**, 1015–1030.e16 (2018).
- 743 31. Zeisel, A. *et al.* Molecular Architecture of the Mouse Nervous System. *Cell* **174**, 999-  
744 1014.e22 (2018).
- 745 32. Zeisel, A. *et al.* Cell types in the mouse cortex and hippocampus revealed by single-cell  
746 RNA-seq. *Science* **347**, 1138–1142 (2015).
- 747 33. Ximerakis, M. *et al.* Single-cell transcriptomic profiling of the aging mouse brain. *Nature*  
748 *Neuroscience* **22**, 1696–1708 (2019).
- 749 34. Martins-De-Souza, D. Mass spectrometry-based proteomics to understand schizophrenia.  
750 *Brazilian Journal of Analytical Chemistry* **7**, 13–17 (2020).
- 751 35. Dhaunchak, A. S. *et al.* A proteome map of axoglial specializations isolated and purified  
752 from human central nervous system. *GLIA* **58**, 1949–1960 (2010).
- 753 36. Gopalakrishnan, G. *et al.* Lipidome and proteome map of myelin membranes. *Journal of*  
754 *Neuroscience Research* **91**, 321–334 (2013).
- 755 37. Patzig, J. *et al.* Septin/anillin filaments scaffold central nervous system myelin to  
756 accelerate nerve conduction. *eLife* **5**, (2016).
- 757 38. Soroor, F. *et al.* Revised subunit order of mammalian septin complexes explains their in  
758 vitro polymerization properties. *Molecular Biology of the Cell* **32**, 289–300 (2021).
- 759 39. Erwig, M. S. *et al.* Anillin facilitates septin assembly to prevent pathological outfoldings of  
760 central nervous system myelin. *eLife* **8**, (2019).
- 761 40. Birling, M.-C., Tait, S., Hardy, R. J. & Brophy, P. J. A Novel Rat Tetraspan Protein in Cells  
762 of the Oligodendrocyte Lineage. *The Journal of Neurochemistry* **73**, 2600–2608 (1999).
- 763 41. Terada, N. *et al.* The tetraspanin protein, CD9, is expressed by progenitor cells committed  
764 to oligodendrogenesis and is linked to  $\beta$ 1 integrin, CD81, and Tspan-2. *GLIA* **40**, 350–359  
765 (2002).
- 766 42. de Monasterio-Schrader, P. *et al.* Uncoupling of neuroinflammation from axonal  
767 degeneration in mice lacking the myelin protein tetraspanin-2. *GLIA* **61**, 1832–1847  
768 (2013).
- 769 43. Shimokawa, N. & Miura, M. Rhombex-29, a Novel Gene of the PLP/ DM20-M6 Family  
770 Cloned From Rat Medulla Oblongata by Differential Display. *Journal of Neuroscience*  
771 *Research* **62**, 1–8 (2000).
- 772 44. Werner, H. B. *et al.* A critical role for the cholesterol-associated proteolipids PLP and M6B  
773 in myelination of the central nervous system. *GLIA* **61**, 567–586 (2013).
- 774 45. Nagy, J. I., Ionescu, A. v, Lynn, B. D. & Rash, J. E. Connexin29 and Connexin32 at  
775 Oligodendrocyte and Astrocyte Gap Junctions and in Myelin of the Mouse Central Nervous  
776 System. *J Comp Neurol* **464**, 356–370 (2003).
- 777 46. Kleopa, K. A., Orthmann, J. L., Enriquez, A., Paul, D. L. & Scherer, S. S. Unique  
778 distributions of the gap junction proteins connexin29, connexin32, and connexin47 in  
779 oligodendrocytes. *GLIA* **47**, 346–357 (2004).
- 780 47. Altevogt, B. M. & Paul, D. L. Four Classes of Intercellular Channels between Glial Cells in  
781 the CNS. *Journal of Neuroscience* **24**, 4313–4323 (2004).
- 782 48. Eiberger, J. *et al.* Expression pattern and functional characterization of connexin29 in  
783 transgenic mice. *GLIA* **53**, 601–611 (2006).
- 784 49. Abe, M. *et al.* PMP2/FABP8 induces PI(4,5)P2-dependent transbilayer reorganization of  
785 sphingomyelin in the plasma membrane. *Cell Reports* **37**, 109935 (2021).
- 786 50. Brostoff, S. W., Karkhanis, Y. D., Carlo, D. J., Reuter, W. & Eylar, E. H. Characterization of  
787 the Major Proteins of Rabbit Sciatic Nerve Myelin. *Brain Research* **86**, 449 (1975).
- 788 51. Kitamura, K., Suzuki, M., Suzuki, A. & Uyemura, K. The Complete Amino Acid Sequence  
789 of the P2 Protein in Bovine Peripheral Nerve Myelin. *FEBS Letters* **115**, (1980).

- 790 52. Dearmond, S. J., Deibler, G. E., Bacon, M., Kies, M. W. & Eng, L. F. The Journal of  
791 Histochemistry and Cytochemistry copyright II A Neurochemical and Immunocytochemical  
792 Study of P2 Protein in Human and Bovine Nervous Systems'. *The Journal of*  
793 *Histochemistry and Cytochemistry* **28**, 1275–1285 (1980).
- 794 53. Whitaker, J. N. The Protein Antigens of Peripheral Nerve Myelin. *Annals of Neurology* **9**,  
795 56–64 (1981).
- 796 54. Zenker, J. *et al.* A role of peripheral myelin protein 2 in lipid homeostasis of myelinating  
797 Schwann cells. *GLIA* **62**, 1502–1512 (2014).
- 798 55. Motley, W. W. *et al.* De novo PMP2 mutations in families with type 1 Charcot-Marie-Tooth  
799 disease. *Brain* **139**, 1649–1656 (2016).
- 800 56. Hong, Y. bin *et al.* A Mutation in PMP2 Causes Dominant Demyelinating Charcot-Marie-  
801 Tooth Neuropathy. *PLoS Genetics* **12**, (2016).
- 802 57. Castelijn, B. *et al.* Hominin-specific regulatory elements selectively emerged in  
803 oligodendrocytes and are disrupted in autism patients. *Nature Communications* **11**, 301  
804 (2020).
- 805 58. Kagawa, T., Mekada, E., Shishido, Y. & Ikenaka, K. Immune System-Related CD9 Is  
806 Expressed in Mouse Central Nervous System Myelin at a Very Late Stage of Myelination.  
807 *J. Neurosci. Res* **50**, 312–320 (1997).
- 808 59. Madhavarao, C. N. *et al.* Immunohistochemical Localization of Aspartoacylase in the Rat  
809 Central Nervous System. *Journal of Comparative Neurology* **472**, 318–329 (2004).
- 810 60. Erwig, M. S. *et al.* Myelin: Methods for purification and proteome analysis. in *Methods in*  
811 *Molecular Biology* vol. 1936 37–63 (Humana Press Inc., 2019).
- 812 61. Siems, S. B. *et al.* Proteome profile of peripheral myelin in healthy mice and in a  
813 neuropathy model. *eLife* **9**, (2020).
- 814 62. Distler, U., Kuharev, J. & Tenzer, S. Biomedical applications of ion mobility-enhanced  
815 data-independent acquisition-based label-free quantitative proteomics. *Expert Review of*  
816 *Proteomics* **11**, 675–684 (2014).
- 817 63. Perez-Riverol, Y. *et al.* The PRIDE database and related tools and resources in 2019:  
818 Improving support for quantification data. *Nucleic Acids Research* **47**, D442–D450 (2019).
- 819 64. Hulsen, T., de Vlieg, J. & Alkema, W. BioVenn - A web application for the comparison and  
820 visualization of biological lists using area-proportional Venn diagrams. *BMC Genomics* **9**,  
821 (2008).
- 822 65. Butler, A., Hoffman, P., Smibert, P., Papalexi, E. & Satija, R. Integrating single-cell  
823 transcriptomic data across different conditions, technologies, and species. *Nature*  
824 *Biotechnology* **36**, 411–420 (2018).
- 825 66. Hafemeister, C. & Satija, R. Normalization and variance stabilization of single-cell RNA-  
826 seq data using regularized negative binomial regression. *Genome Biology* **20**, (2019).
- 827 67. Raudvere, U. *et al.* G:Profiler: A web server for functional enrichment analysis and  
828 conversions of gene lists (2019 update). *Nucleic Acids Research* **47**, W191–W198 (2019).
- 829 68. Merico, D., Isserlin, R., Stueker, O., Emili, A. & Bader, G. D. Enrichment map: A network-  
830 based method for gene-set enrichment visualization and interpretation. *PLoS ONE* **5**,  
831 (2010).
- 832 69. Kucera, M., Isserlin, R., Arkhangorodsky, A. & Bader, G. D. AutoAnnotate: A Cytoscape  
833 app for summarizing networks with semantic annotations. *F1000Research* **5**, (2016).
- 834 70. Shannon, P. *et al.* Cytoscape: A software Environment for integrated models of  
835 biomolecular interaction networks. *Genome Research* **13**, 2498–2504 (2003).

836  
837  
838



839 **Acknowledgments**

840 We thank S. Ghandour, M. Jung and C. Linington for antibodies, A. Fahrenholz, D. Hesse, R.  
841 Jung and B. Sadowski for technical help and the International Max Planck Research School  
842 for Genome Science (IMPRS-GS) for supporting V.-I.G. and S.B.S. We gratefully acknowledge  
843 all contributors of data and data platforms that facilitate access to data sets and promote open-  
844 science practices, including AD Knowledge portal, Gene Expression Omnibus (GEO),  
845 Mousebrain.org, Single-Cell Portal and the ProteomeXchange Consortium partner repository  
846 PRIDE.

847  
848 **Competing interests statement**

849 The authors declare that no competing interests exist.

850  
851 **Funding**

852 Deutsche Forschungsgemeinschaft (DFG) WE 2720/2-2 to HBW  
853 Deutsche Forschungsgemeinschaft (DFG) WE 2720/4-1 to HBW  
854 Deutsche Forschungsgemeinschaft (DFG) WE 2720/5-1 to HBW  
855 European Research Council (ERC) Advanced Grant MyeliNano to KAN  
856 The funders had no role in study design, data collection and interpretation, or the decision to  
857 submit the work for publication.

858  
859 **Author contributions**

|     |                         |                                                                                         |
|-----|-------------------------|-----------------------------------------------------------------------------------------|
| 860 | Vasiliki-Ilya Gargareta | Investigation, Writing-review & editing                                                 |
| 861 | Josefine Reuschenbach   | Investigation, Writing-review & editing                                                 |
| 862 | Sophie B. Siems         | Investigation, Writing-review & editing                                                 |
| 863 | Ting Sun                | Investigation, Supervision, Writing-review & editing                                    |
| 864 | Lars Piepkorn           | Investigation, Writing-review & editing                                                 |
| 865 | Carolina Mangana        | Investigation, Writing-review & editing                                                 |
| 866 | Erik Späte              | Investigation, Writing-review & editing                                                 |
| 867 | Sandra Goebbels         | Investigation, Writing-review & editing                                                 |
| 868 | Inge Huitinga           | Unpublished Resources, Writing-review & editing                                         |
| 869 | Wiebke Möbius           | Investigation, Writing-review & editing                                                 |
| 870 | Klaus-Armin Nave        | Writing-review & editing                                                                |
| 871 | Olaf Jahn               | Conceptualization, Investigation, Writing-review & editing                              |
| 872 | Hauke B. Werner         | Conceptualization, Supervision, Writing-original draft,<br>873 Writing-review & editing |

874  
875 **Author ORCIDs**

|     |                         |                                                                                         |
|-----|-------------------------|-----------------------------------------------------------------------------------------|
| 876 | Vasiliki-Ilya Gargareta | <a href="http://orcid.org/0000-0002-6673-0714">http://orcid.org/0000-0002-6673-0714</a> |
| 877 | Josefine Reuschenbach   | <a href="http://orcid.org/0000-0002-8374-777X">http://orcid.org/0000-0002-8374-777X</a> |
| 878 | Sophie B. Siems         | <a href="http://orcid.org/0000-0002-7760-2507">http://orcid.org/0000-0002-7760-2507</a> |
| 879 | Ting Sun                | <a href="http://orcid.org/0000-0002-7104-7215">http://orcid.org/0000-0002-7104-7215</a> |
| 880 | Wiebke Möbius           | <a href="http://orcid.org/0000-0002-2902-7165">http://orcid.org/0000-0002-2902-7165</a> |
| 881 | Klaus-Armin Nave        | <a href="http://orcid.org/0000-0001-8724-9666">http://orcid.org/0000-0001-8724-9666</a> |
| 882 | Olaf Jahn               | <a href="http://orcid.org/0000-0002-3397-8924">http://orcid.org/0000-0002-3397-8924</a> |
| 883 | Hauke B. Werner         | <a href="http://orcid.org/0000-0002-7710-5738">http://orcid.org/0000-0002-7710-5738</a> |

884  
885

886 **Figure legends**

887

888

889 **Figure 1. Proteome analysis of human CNS myelin.**

890 **a** Number and relative abundance of proteins identified in myelin purified from human normal-  
891 appearing white matter according to two data-independent acquisition (DIA) mass  
892 spectrometric modes ( $MS^E$ ,  $UDMS^E$ ). Note that  $UDMS^E$  (blue) identifies a larger number of  
893 proteins in myelin but provides a lower dynamic range of quantification.  $MS^E$  (lime green)  
894 identifies fewer proteins, but the comparatively higher dynamic range of quantification provides  
895 information about the relative abundance of the exceptionally abundant myelin proteins  
896 proteolipid protein 1 (PLP1), myelin basic protein (MBP) and cyclic nucleotide  
897 phosphodiesterase (CNP). See **Figure 1-source data 1** for datasets. ppm, parts per million.

898 **b** Scatter plot comparing the  $\log_2$ -transformed relative abundance of proteins identified in  
899 myelin by  $MS^E$  against their abundance as identified by  $UDMS^E$ . Data points highlighted in blue  
900 represent known myelin proteins, some of which are indicated. The correlation coefficient ( $r$ )  
901 was calculated for all proteins identified by  $MS^E$  (gray) and for known myelin proteins (blue).  
902 The regression line serves as navigational mean. Note that PLP, MBP, and CNP deviate the  
903 most from the regression line due to the limitations of  $UDMS^E$  in the correct quantification of  
904 such exceptionally abundant myelin proteins.

905 **c** Heatmap comparing the relative abundance of known myelin proteins in purified myelin  
906 compared to white matter homogenate. Mass spectrometric quantification based on five  
907 biological replicates (M1, M2, M3, M4, M5) as the average of two technical replicates each.  
908 Each horizontal line displays the fold change (FC) of a known myelin protein of which the  
909 abundance is increased (magenta) or reduced (turquoise) in human myelin compared to its  
910 average abundance in white matter lysate plotted on a  $\log_2$  color scale. As to the technical  
911 quality of the proteomic data and the purity of the myelin fraction, also see Pearson's  
912 correlation coefficients in **Figure 1-supplement 2** and heatmap comparisons for marker  
913 proteins representing other cell types and organelles in **Figure 1-supplement 3**.

914 **d** Pie chart showing the relative abundance of proteins identified by  $MS^E$  in myelin purified from  
915 the human white matter. Relative abundance is given in percentage with relative standard  
916 deviation (% +/- RSD). Note that known myelin proteins constitute approximately 82% of the  
917 total myelin protein; proteins so far not known as myelin proteins constitute about 18%.

918

919



920 **Figure 1-supplement 1. Electron micrograph of the myelin-enriched fraction.**

921 Representative electron micrograph (EM) of the myelin-enriched light-weight membrane  
922 fraction purified from the normal appearing white matter of a human subject. Myelin sheaths  
923 are identified by their typical multimembrane structure; cellular compartments other than  
924 myelin were virtually undetectable.

925

926

927 **Figure 1-supplement 2. Pearson's correlation for proteome analysis by MS<sup>E</sup> and UDMS<sup>E</sup>**

928 Clustered heatmap of Pearson's correlation coefficients for protein abundance comparing  
929 myelin-enriched fraction and white matter homogenate by two data acquisition modes (MS<sup>E</sup> in  
930 **a**; UDMS<sup>E</sup> in **b**). The sex of the human subjects is indicated above the heatmap (female, light  
931 gray; male, dark grey). Note that the groups 'lysate' (Control\_L) and 'myelin' (Control\_M) as  
932 expected form with a high correlation of > 0.9 and that the two technical replicates cluster  
933 together adjacently. See **Figure 1-source data 1** for datasets. n=5 biological replicates  
934 analyzed as two technical replicates each.

935

936

937 **Figure 1-supplement 3. Heatmaps comparing the relative abundance of marker proteins**  
938 **in purified myelin versus white matter homogenate.**

939 **a-h** Fold change (FC) comparing the abundance in myelin purified from human normal-  
940 appearing white matter with that in white matter homogenate according to the MS<sup>E</sup> dataset of  
941 marker proteins selected on the basis of prior knowledge for neurons (**a**), synapses (**b**),  
942 astrocytes (**c**), microglia (**d**), antioxidative proteins (**e**), nuclear-encoded mitochondrial proteins  
943 (**f**), mitochondrial-encoded proteins (**g**), and constituents of the extracellular matrix (**h**). In the  
944 heatmap each horizontal line corresponds to the fold-change (FC) of the abundance of a  
945 protein in purified myelin compared to its average abundance in white matter homogenate  
946 plotted on a log<sub>2</sub> color scale with increased (magenta) or decreased (turquoise) abundance in  
947 purified myelin. Heatmaps display five biological replicates (M1, M2, M3, M4, M5) as the  
948 average of two technical replicates each. See **Figure 1-source data 1** for datasets. Note that  
949 most marker proteins for cell types or compartments other than myelin are reduced in  
950 abundance or not detected (n.d., marked with a diagonally crossed field) in myelin.

951

952

953 **Figure 2. Comparison of the protein composition of human and mouse CNS myelin.**  
954 **a** Silver-stained SDS-PAGE (0.9  $\mu$ g protein load) of myelin purified from human normal-  
955 appearing white matter and C57Bl/6N-mouse brains. Note that the band patterns are roughly  
956 comparable but not identical. Gel shows n=3 biological replicates per species.  
957 **b** Venn diagram comparing 81 selected known myelin proteins identified by MS<sup>E</sup> and UDMS<sup>E</sup>  
958 in myelin purified from human white matter (blue) and C57Bl/6N-mouse brains (orange) as  
959 recently established using the same methods<sup>9</sup>. Note that most known myelin proteins were  
960 identified in myelin of both species, while multiple myelin proteins were identified in myelin of  
961 only one species.  
962 **c,d** Scatter plots of the log<sub>2</sub>-transformed relative abundance of proteins identified in human  
963 myelin by MS<sup>E</sup> (**c**) or UDMS<sup>E</sup> (**d**) plotted against their relative abundance in mouse myelin as  
964 recently established using the same methods<sup>9</sup>. Correlation coefficients (r) were calculated for  
965 all proteins identified in human myelin (gray) or known myelin proteins (blue). Regression lines  
966 serve as navigational mean.  
967 **e** Heatmap comparing the relative abundance of known myelin proteins identified by MS<sup>E</sup> in  
968 human myelin with that in mouse myelin according to the same method<sup>9</sup>. Each horizontal line  
969 displays the fold-change (FC) of a protein in five biological replicates (M1- M5) of human myelin  
970 compared to its average abundance in CNS myelin of mice plotted on a log<sub>2</sub>-color scale. Note  
971 that several proteins display higher abundance in human (blue) or mouse (orange) myelin,  
972 while others show approximately similar relative abundance (white).  
973 **f** Immunoblot analysis confirms comparatively higher abundance in human myelin of PMP2,  
974 CRYAB, CD9 and PADI2, approximately equal abundance of PLP, CNP, SEPTIN2, SEPTIN7  
975 and SEPTIN8, and comparatively higher abundance in mouse myelin of TSPAN2, GPM6B,  
976 GJC3, ASPA, MOBP, IGSF8, SIRT2, CLDN11, CA2, MAG and MOG, as implied by the MS<sup>E</sup>  
977 analysis. Note that immunoblot-based comparison of the relative abundance of MBP across  
978 species is not straightforward because MBP displays one dominant isoform (18.5 kDa) in  
979 human CNS myelin but three main isoforms (14.0, 17.0 and 18.5 kDa) in mouse CNS myelin  
980 due to species-dependent alternative splicing. Blots show n=3 biological replicates per  
981 species. For immunohistochemistry detecting PMP2 in human optic nerve cross sections see  
982 **Figure 2-supplement 1.**  
983  
984

985 **Figure 2-supplement 1. Detection of PMP2 in human CNS myelin by immunoblot and**  
986 **immunohistochemistry.**

987 **a** Immunoblot analysis of myelin purified from human normal-appearing white matter (CNS),  
988 C57Bl/6N mouse brains (CNS) and C57Bl/6N mouse sciatic nerves (PNS) using antibodies  
989 specific for PMP2. Blot shows two biological replicates per condition. Note that PMP2 was  
990 readily detected in human CNS myelin and mouse PNS myelin but not in mouse CNS myelin.  
991 SIRT2 was detected as a control.

992 **b** Confocal micrograph of immunohistochemistry detecting PMP2 (green) and TUJ1 (magenta)  
993 in paraffin-embedded cross-sectioned optic nerves of a human subject. Note that PMP2 labels  
994 myelin sheaths (arrowheads), while TUJ1 labels neuron-specific beta-III tubulin, i.e. axonal  
995 microtubules in this cross section. Nuclear staining (DAPI) is in blue. Shown is one biological  
996 replicate representative of three biological replicates. Scale bar, 20  $\mu\text{m}$ .

997

998

999 **Figure 3. Cross species scRNA-seq profile comparison of mature oligodendrocytes.**  
1000 **a-c** UMAP plot of the scRNA-seq profile of mature oligodendrocytes (MOL) integrated from  
1001 previously established human (**b**) and mouse (**c**) datasets. In (**a**) cells contributed by distinct  
1002 studies are highlighted in different colors; the corresponding references are given.  
1003 **d,e** UMAP feature plots highlighting expression of selected MOL marker genes (**d**) and  
1004 transcription factors (**e**) in the integrated object comprising MOL of both humans (blue) and  
1005 mice (orange).  
1006 **f** UMAP feature plots and violin plots exemplify genes that display preferential expression in  
1007 MOL of humans (*PMP2*; *PADI2*) or mice (*GJC3*, *TSPAN2*, *CA2*).  
1008  
1009

1010 **Figure 3-supplement 1. Integrated scRNA-seq profiles of the oligodendrocyte lineage in**  
1011 **humans and mice.**

1012 **a,b** UMAP plots of the scRNA-seq profiles of oligodendrocyte lineage cells integrated  
1013 separately for humans (**a**) and mice (**b**) from previously published datasets. Cells contributed  
1014 by distinct studies are highlighted in different colors; the corresponding references are given.

1015 **c-f** UMAP plots highlighting expression of marker genes for oligodendrocyte precursor cells  
1016 (OPC; **c**), newly formed oligodendrocytes (NFO; **d**) and mature oligodendrocytes (MOL; **e**) in  
1017 the integrated human (blue) and mouse (orange) datasets. Note that some genes display  
1018 preferential expression in human (*PMP2*, *CD9*, *CRYAB*) or mouse (*GJC3*, *TSPAN2*, *CA2*)  
1019 oligodendrocytes (**f**).

1020

1021

1022 **Figure 3-supplement 2. Cross species MOL transcriptome correlation.**

1023 Scatter plot comparing the van der Waerden (vdW) score-transformed average expression of  
1024 3000 integration features in human and mouse mature oligodendrocytes (MOL). Data points  
1025 of 34 known myelin-related transcripts that encode proteins represented in the myelin  
1026 proteome are highlighted in blue (22 of which annotated with gene name); 6 known myelin-  
1027 related transcripts of which the protein product is not present in the myelin proteome are  
1028 highlighted in orange; 4 myelination-related transcription factors are highlighted in green; other  
1029 transcripts are displayed in gray. Pearson correlation coefficient is given for known myelin-  
1030 related transcripts (as highlighted in blue) or all transcripts. Regression line represents fit of  
1031 data for navigational purpose.

1032

1033

1034 **Figure 3-supplement 3. Comparisons of myelin proteome and MOL transcriptome**

1035 vdW scores calculated from the mean abundance of integration features ( $n = 3,000$ ) in  
1036 integrated scRNA-seq datasets of humans (**a,b**) and mice (**c,d**), and in the CNS myelin  
1037 proteome in the corresponding species as acquired using the MS<sup>E</sup> (**a,c**) and UDMS<sup>E</sup> (**b,d**)  
1038 modes. vdW-normalized data were subjected to Pearson correlation analysis and visualized  
1039 as scatter plot. Known myelin proteins are highlighted, and the distribution of normalized  
1040 protein and RNA profiles are illustrated by density plots along the axes.

1041

1042

1043 **Figure 4. Human and mouse mature oligodendrocyte subpopulation analysis.**  
1044 **a** UMAP plot showing five subpopulations of mature oligodendrocytes (MOL) identified upon  
1045 integrating all human and mouse scRNA-seq datasets.  
1046 **b** Bubble plot showing the top 5 subpopulation marker genes. All cells in all clusters also  
1047 express high levels of known myelin-related marker transcripts (*CNP*, *PLP1*, *MBP*, *MAG*,  
1048 *CLDN11*).  
1049 **c** Relative proportion of mature oligodendrocyte subpopulations in humans and mice. Note  
1050 that MOL of both species contribute to all subpopulations.  
1051  
1052  
1053 **Figure 4-supplement 1. Gene ontology term topics enriched per subpopulation**  
1054 Gene ontology (GO) terms of biological processes (small circles) were grouped as topics (large  
1055 circles). Colors represent association with MOL clusters displayed in **Figure 4**. FDR < 0.05.  
1056  
1057



1058 **Figure 1-source data 1. Label-free quantification of proteins in human CNS myelin and**  
1059 **white matter homogenate by two different data acquisition modes**

1060 Identification and quantification data of detected myelin-associated and homogenate proteins.  
1061 Tryptic peptides derived from two technical replicates (replicate digestion) per five biological  
1062 replicates were analyzed by LC-MS (10 runs per condition in total). Proteins (FDR < 1%; 2  
1063 peptides/protein) and peptides (FDR < 1%; ≥6 amino acids) were identified by database search  
1064 against the UniprotKB/SwissProt mouse database using PLGS. Data were post-processed  
1065 with the software package ISOQuant to calculate absolute in-sample amounts for each  
1066 detected protein based on the TOP3 approach. Reported abundance values are defined as  
1067 the relative amount of each protein in respect to the sum over all detected proteins (ppm: parts  
1068 per million (w/w) of total protein). Typical contaminant proteins like albumin, hemoglobins,  
1069 keratins, and trypsin were filtered. Tables are sorted by description (column D) in alphabetical  
1070 order.

1071

1072

1073 **Figure 2-source data 1. Labeled original immunoblots**

1074

1075

1076 **Figure 3-source data 1. Parameters applied for scRNA-seq individual dataset quality control**  
1077 **and integrative analysis.**

1078

1079

1080 **Figure 4-source data 1. MAST calculated marker genes from human and mouse integrated**  
1081 **MOL subpopulations.**

1082

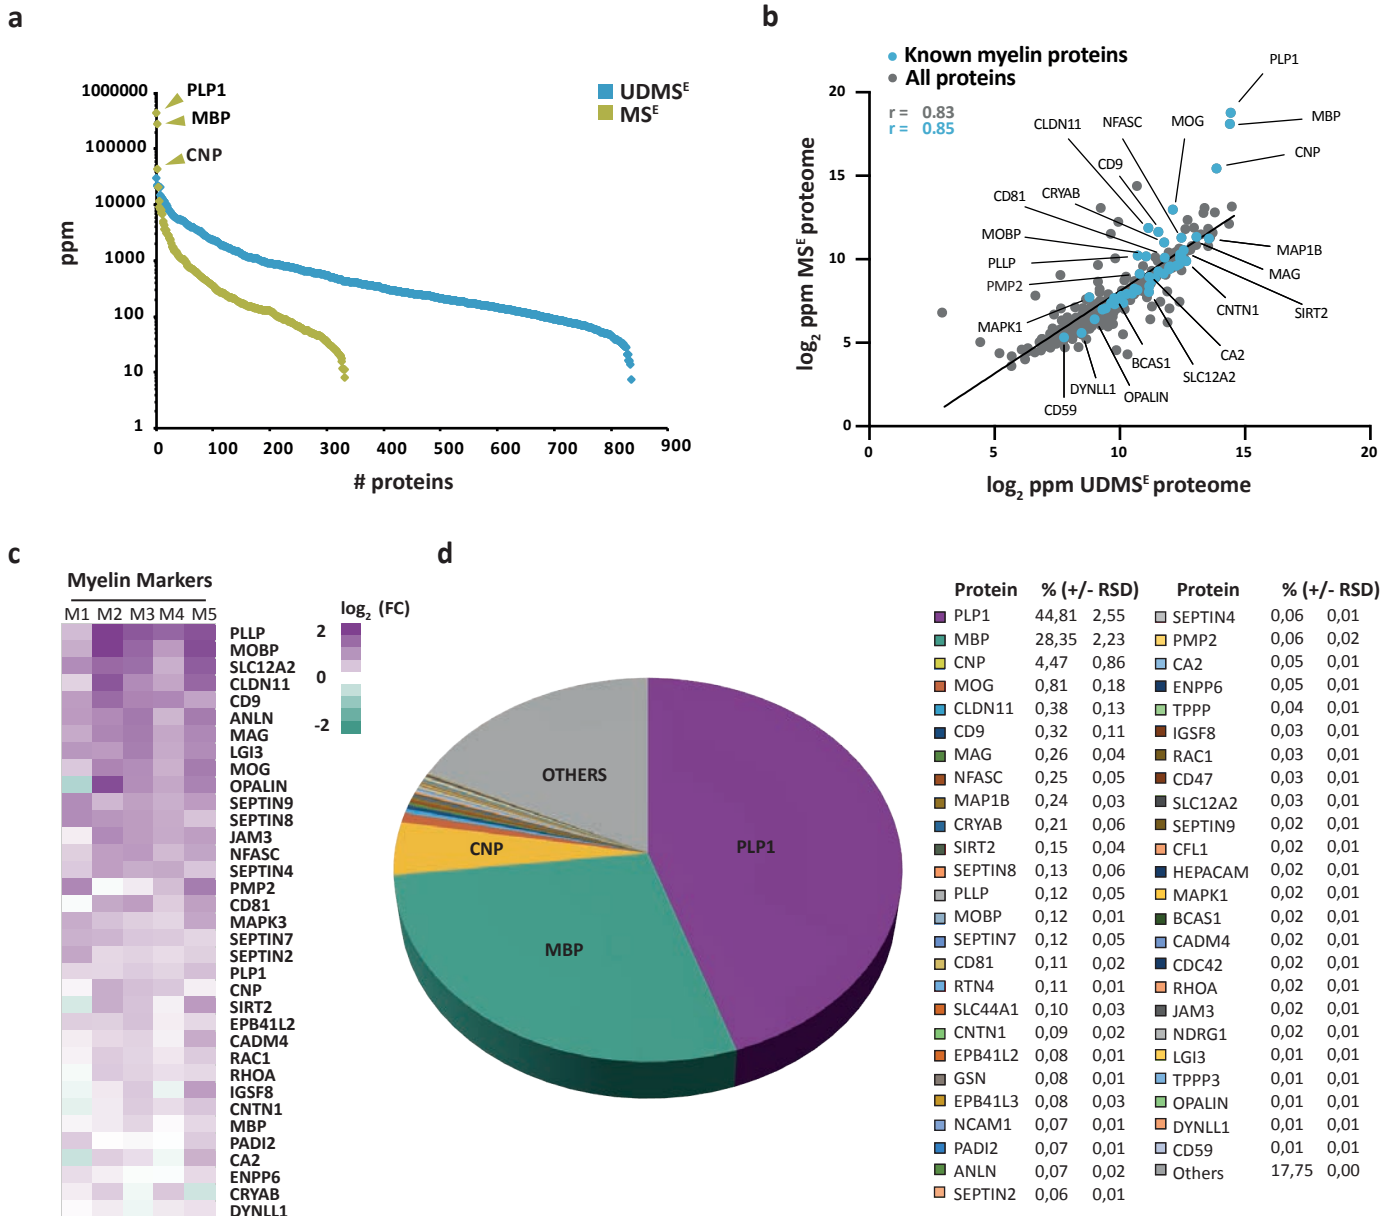

**Figure 1. Proteome analysis of human CNS myelin.**

**a** Number and relative abundance of proteins identified in myelin purified from human normal-appearing white matter according to two data-independent acquisition (DIA) mass spectrometric modes ( $MS^E$ ,  $UDMS^E$ ). Note that  $UDMS^E$  (blue) identifies a larger number of proteins in myelin but provides a lower dynamic range of quantification.  $MS^E$  (lime green) identifies fewer proteins, but the comparatively higher dynamic range of quantification provides information about the relative abundance of the exceptionally abundant myelin proteins proteolipid protein 1 (PLP1), myelin basic protein (MBP) and cyclic nucleotide phosphodiesterase (CNP). See **Fig.1-source data 1** for datasets. ppm, parts per million. **b** Scatter plot comparing the  $\log_2$ -transformed relative abundance of proteins identified in myelin by  $MS^E$  against their abundance as identified by  $UDMS^E$ . Data points highlighted in blue represent known myelin proteins, some of which are indicated. The correlation coefficient ( $r$ ) was calculated for all proteins identified by  $MS^E$  (gray) and for known myelin proteins (blue). The regression line serves as navigational mean. Note that PLP, MBP, and CNP deviate the most from the regression line due to the limitations of  $UDMS^E$  in the correct quantification of such exceptionally abundant myelin proteins. **c** Heatmap comparing the relative abundance of known myelin proteins in purified myelin compared to white matter homogenate. Mass spectrometric quantification based on five biological replicates (M1, M2, M3, M4, M5) as the average of two technical replicates each. Each horizontal line displays the fold change (FC) of a known myelin protein of which the abundance is increased (magenta) or reduced (turquoise) in human myelin compared to its average abundance in white matter lysate plotted on a  $\log_2$  color scale. As to the technical quality of the proteomic data and the purity of the myelin fraction, also see Pearson's correlation coefficients in **Figure 1-Figure supplement 2** and heatmap comparisons for marker proteins representing other cell types and organelles in **Figure 1-Figure supplement 3**. **d** Pie chart showing the relative abundance of proteins identified by  $MS^E$  in myelin purified from the human white matter. Relative abundance is given in percentage with relative standard deviation (% +/- RSD). Note that known myelin proteins constitute approximately 82% of the total myelin protein; proteins so far not known as myelin proteins constitute about 18%.

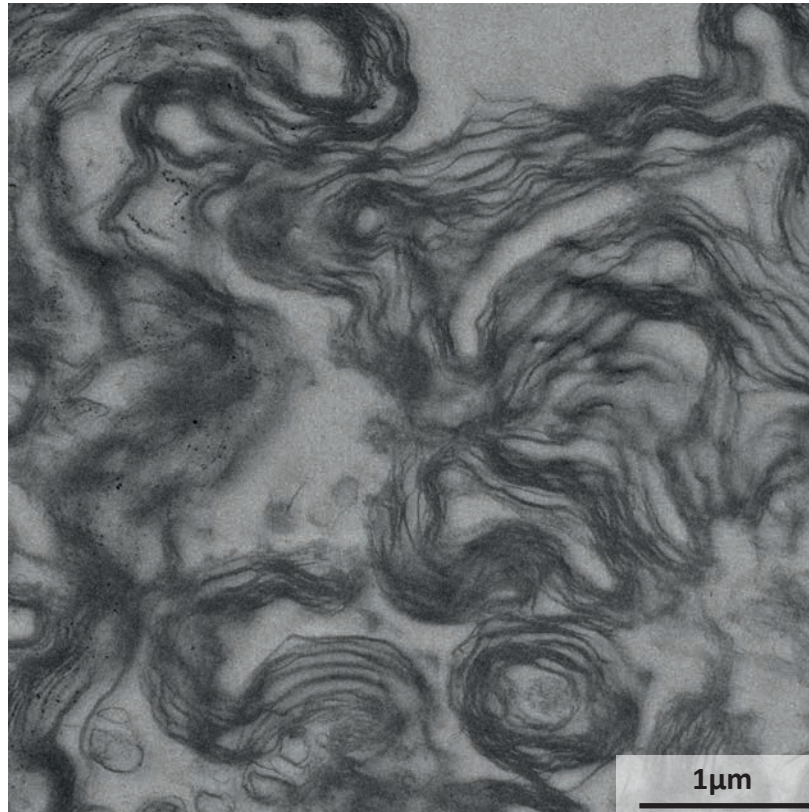

**Figure 1 - figure supplement 1. Electron micrograph of the myelin-enriched fraction.** Representative electron micrograph (EM) of the myelin-enriched light-weight membrane fraction purified from the normal appearing white matter of a human subject. Myelin sheaths are identified by their typical multimembrane structure; cellular compartments other than myelin were virtually undetectable.

## Gargareta et al., Figure 1 - figure supplement 2

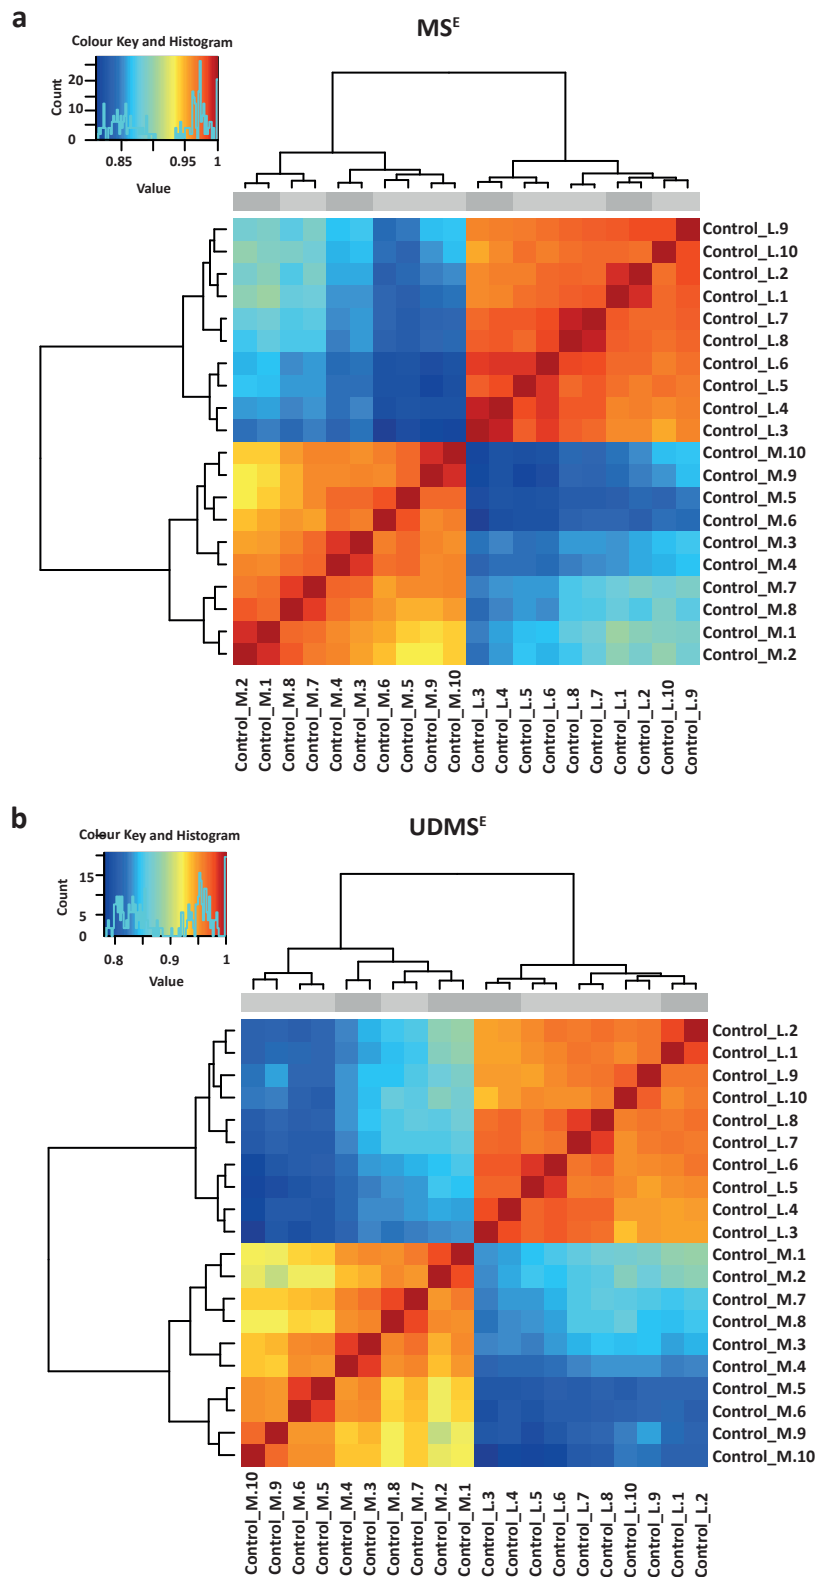

**Figure 1 - figure supplement 2. Pearson's correlation for proteome analysis by MS<sup>E</sup> and UDMS<sup>E</sup>**

Clustered heatmap of Pearson's correlation coefficients for protein abundance comparing myelin-enriched fraction and white matter homogenate by two data acquisition modes (MS<sup>E</sup> in a; UDMS<sup>E</sup> in b). The sex of the human subjects is indicated above the heatmap (female, light gray; male, dark gray). Note that the groups 'lysate' (Control\_L) and 'myelin' (Control\_M) as expected form with a high correlation of > 0.9 and that the two technical replicates cluster together adjacently. See **Fig1 - source data 1** for datasets. n=5 biological replicates analyzed as two technical replicates each.

Gargareta et al., Figure 1 - figure supplement 3

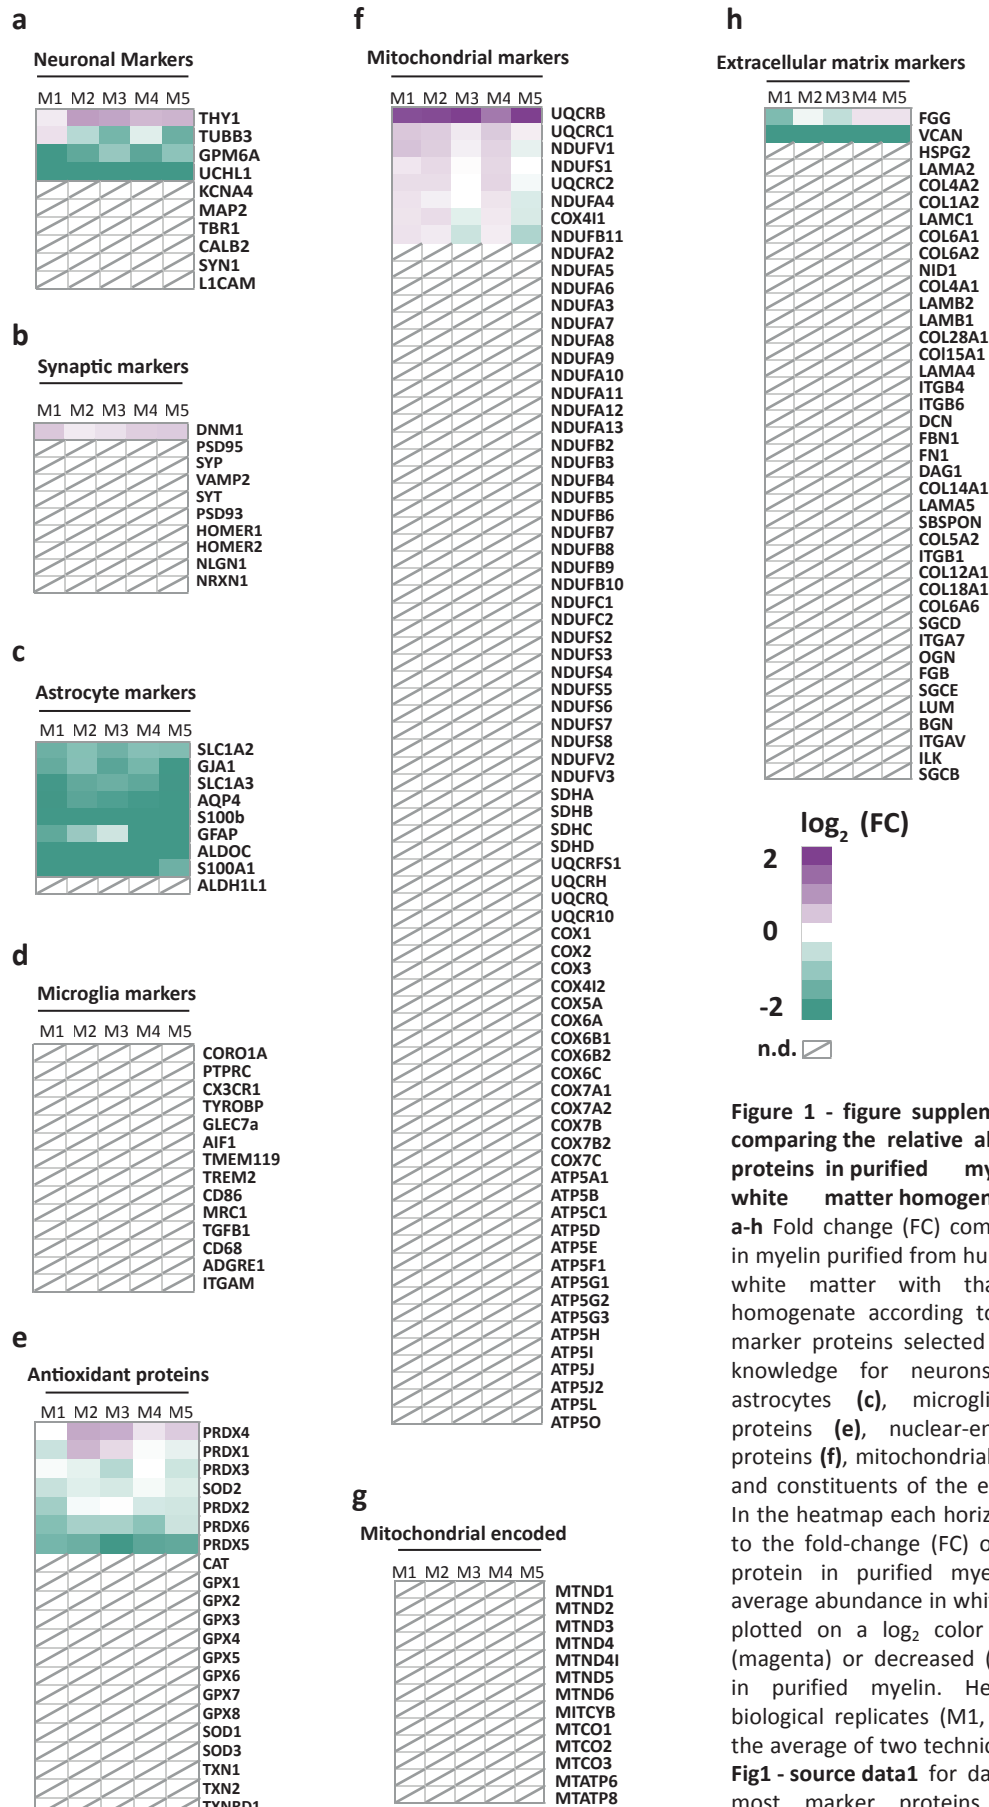

**Figure 1 - figure supplement 3. Heatmaps comparing the relative abundance of marker proteins in purified myelin versus white matter homogenate.**

**a-h** Fold change (FC) comparing the abundance in myelin purified from human normal-appearing white matter with that in white matter homogenate according to the MS<sup>E</sup> dataset of marker proteins selected on the basis of prior knowledge for neurons (a), synapses (b), astrocytes (c), microglia (d), antioxidative proteins (e), nuclear-encoded mitochondrial proteins (f), mitochondrial-encoded proteins (g), and constituents of the extracellular matrix (h). In the heatmap each horizontal line corresponds to the fold-change (FC) of the abundance of a protein in purified myelin compared to its average abundance in white matter homogenate plotted on a log<sub>2</sub> color scale with increased (magenta) or decreased (turquoise) abundance in purified myelin. Heatmaps display five biological replicates (M1, M2, M3, M4, M5) as the average of two technical replicates each. See **Fig1 - source data1** for datasets. Note that most marker proteins for cell types or compartments other than myelin are reduced in abundance or not detected (n.d., marked with a diagonally crossed field) in myelin.



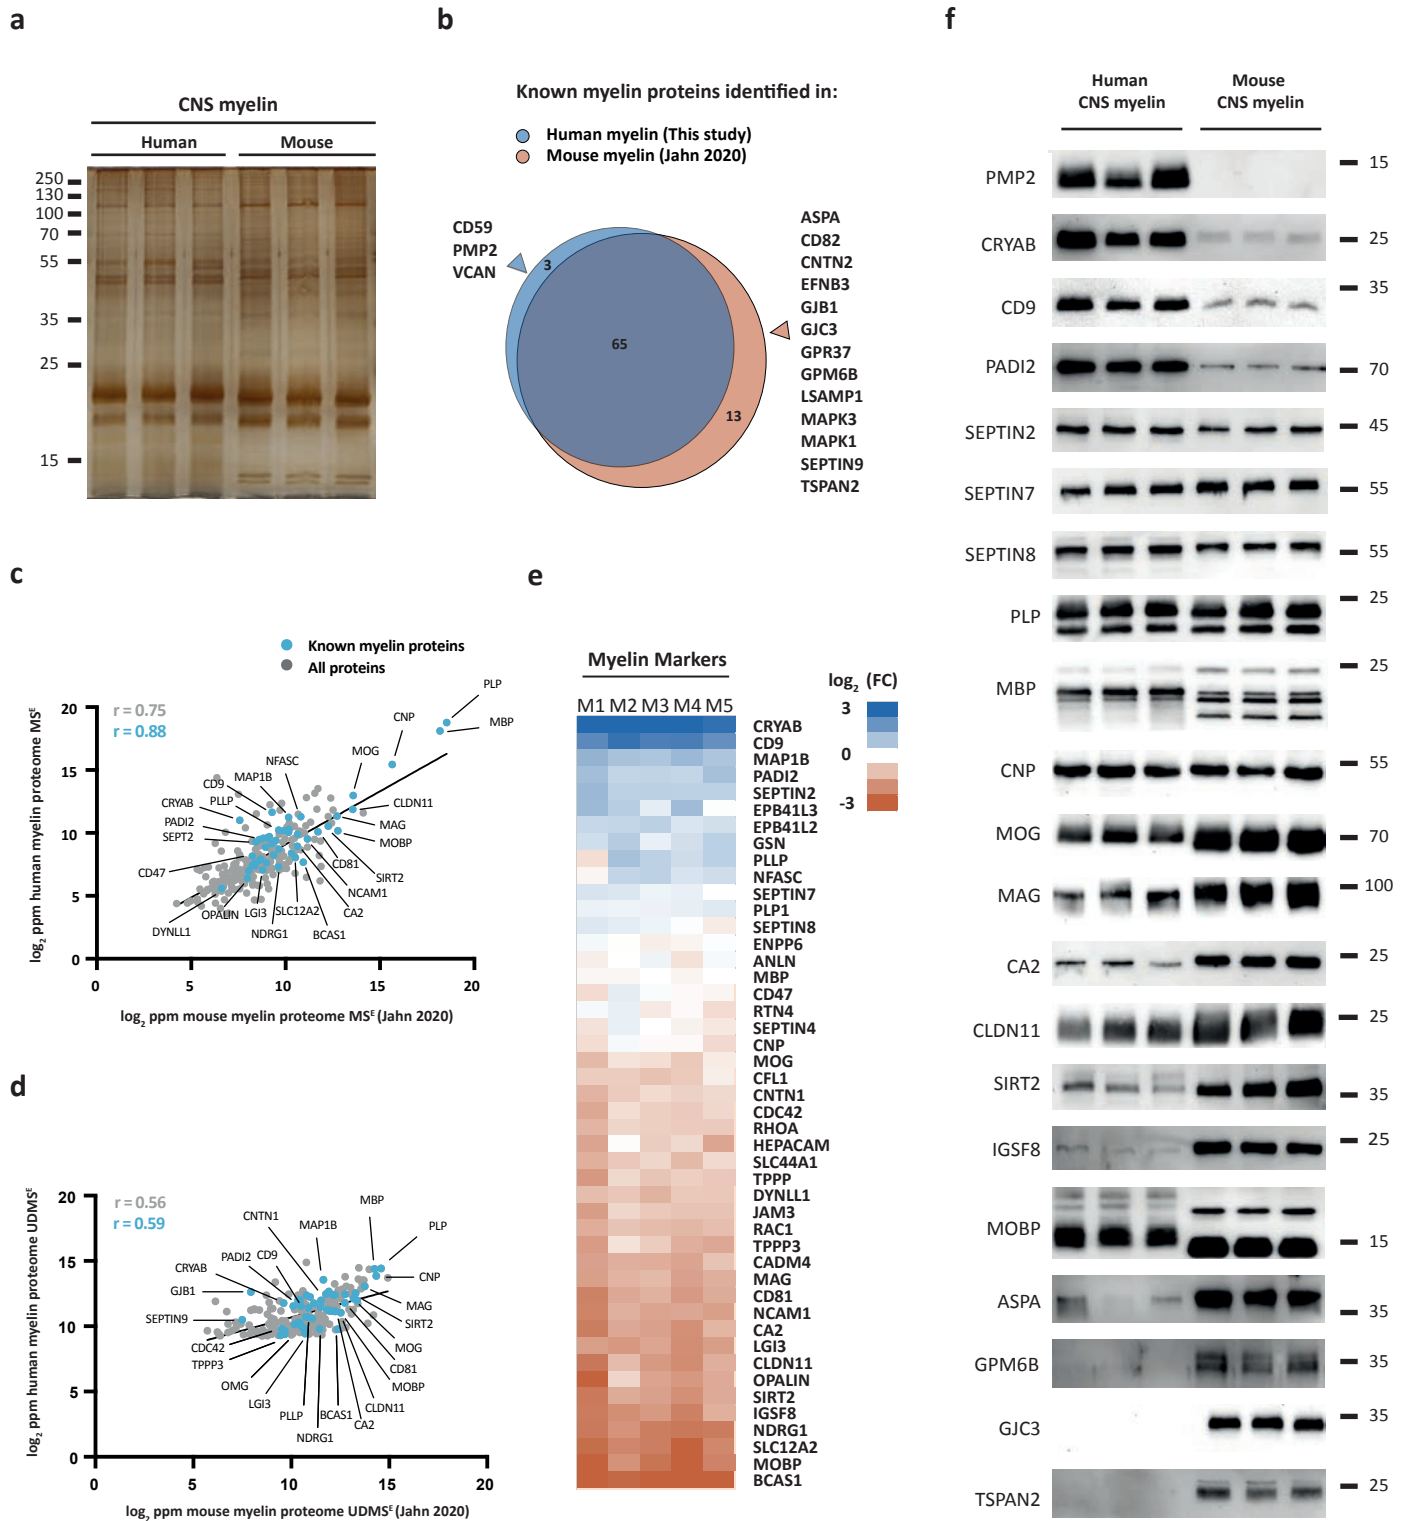

**Figure 2. Comparison of the protein composition of human and mouse CNS myelin.**

**a** Silver-stained SDS-PAGE (0.9  $\mu$ g protein load) of myelin purified from human normal-appearing white matter and C57Bl/6N-mouse brains. Note that the band patterns are roughly comparable but not identical. Gel shows  $n=3$  biological replicates per species. **b** Venn diagram comparing 81 selected known myelin proteins identified by MSE and UDMSE in myelin purified from human white matter (blue) and C57Bl/6N-mouse brains (orange) as recently established using the same methods 9. Note that most known myelin proteins were identified in myelin of both species, while multiple myelin proteins were identified in myelin of only one species. **c,d** Scatter plots of the  $\log_2$ -transformed relative abundance of proteins identified in human myelin by MSE (c) or UDMSE (d) plotted against their relative abundance in mouse myelin as recently established using the same methods. Correlation coefficients ( $r$ ) were calculated for all proteins identified in human myelin (gray) or known myelin proteins (blue). Regression lines serve as navigational mean. **e** Heatmap comparing the relative abundance of known myelin proteins identified by MSE in human myelin with that in mouse myelin according to the same method 9. Each horizontal line displays the fold-change (FC) of a protein in five biological replicates (M1- M5) of human myelin compared to its average abundance in CNS myelin of mice plotted on a  $\log_2$ -color scale. Note that several proteins display higher abundance in human (blue) or mouse (orange) myelin, while others show approximately similar relative abundance (white). **f** Immunoblot analysis confirms comparatively higher abundance in human myelin of PMP2, CRYAB, CD9 and PADI2, approximately equal abundance of PLP, CNP, SEPTIN2, SEPTIN7 and SEPTIN8, and comparatively higher abundance in mouse myelin of TSPAN2, GPM6B, GJC3, ASPA, MOBP, IGSF8, SIRT2, CLDN11, CA2, MAG and MOG, as implied by the MSE analysis. Note that immunoblot-based comparison of the relative abundance of MBP across species is not straightforward because MBP displays one dominant isoform (18.5 kDa) in human CNS myelin but three main isoforms (14.0, 17.0 and 18.5 kDa) in mouse CNS myelin due to species-dependent alternative splicing. Blots show  $n=3$  biological replicates per species. For immunohistochemistry detecting PMP2 in human optic nerve cross sections see Fig. 2 - figure supplement 1.



## Gargareta et al., Figure 2 - figure supplement 1

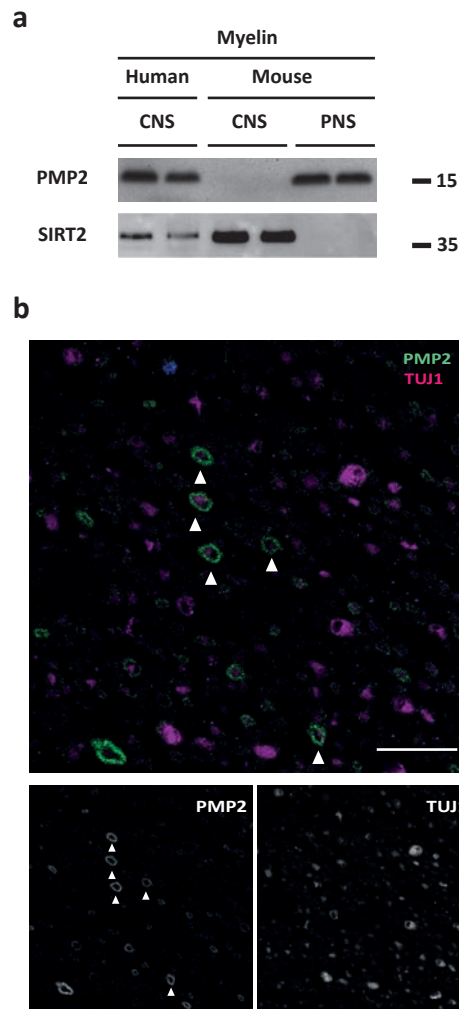

**Figure 2 - figure supplement 1. Detection of PMP2 in human CNS myelin by immunoblot and immunohistochemistry.**

**a** Immunoblot analysis of myelin purified from human normal-appearing white matter (CNS), C57Bl/6N mouse brains (CNS) and C57Bl/6N mouse sciatic nerves (PNS) using antibodies specific for PMP2. Blot shows two biological replicates per condition. Note that PMP2 was readily detected in human CNS myelin and mouse PNS myelin but not in mouse CNS myelin. SIRT2 was detected as a control.

**b** Confocal micrograph of immunohistochemistry detecting PMP2 (green) and TUJ1 (magenta) in paraffin-embedded cross-sectioned optic nerves of a human subject. Note that PMP2 labels myelin sheaths (arrowheads), while TUJ1 labels neuron-specific beta-III tubulin, i.e. axonal microtubules in this cross section. Nuclear staining (DAPI) is in blue. Shown is one biological replicate representative of three biological replicates. Scale bar, 20  $\mu$ m.

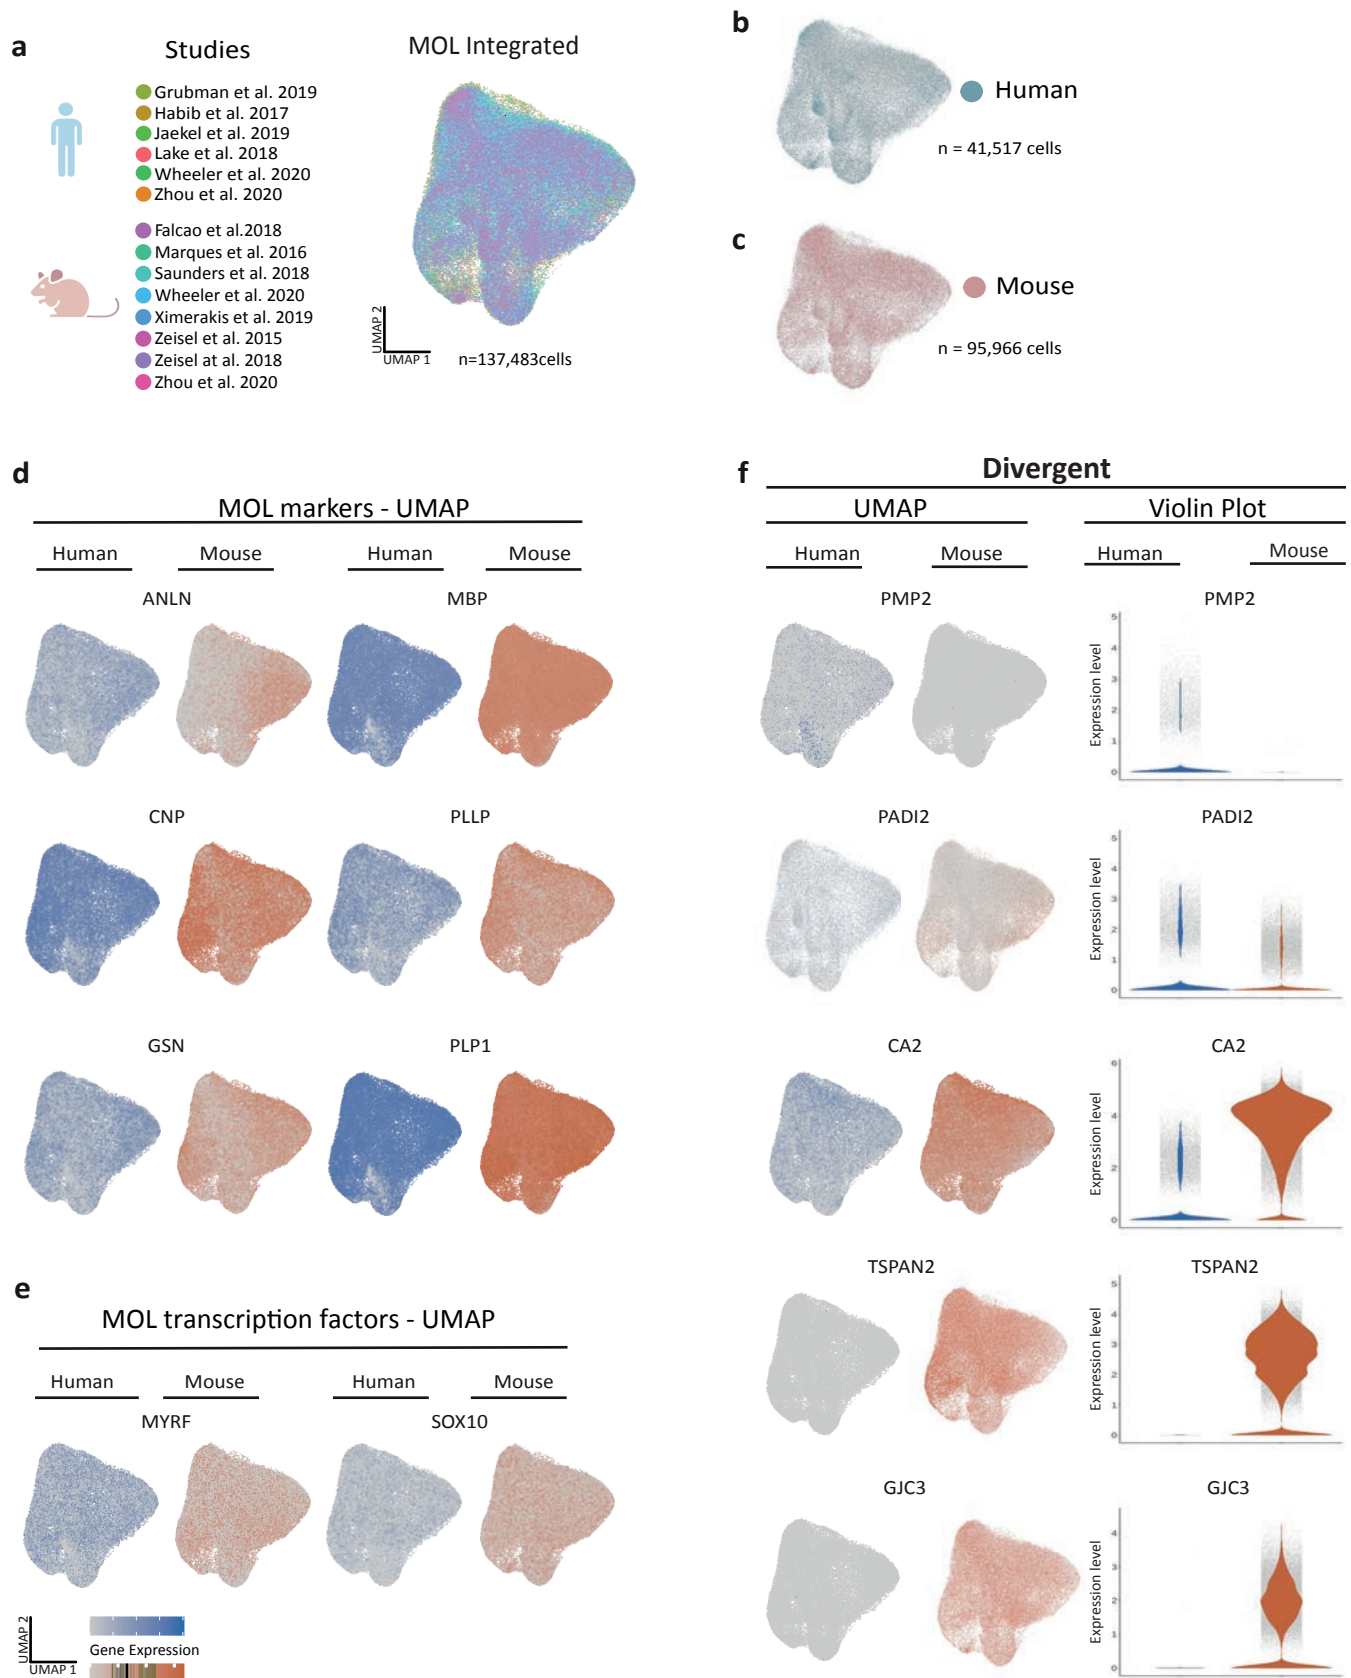

**Figure 3. Cross species scRNA-seq profile comparison of mature oligodendrocytes.**

**a-c** UMAP plot of the scRNA-seq profile of mature oligodendrocytes (MOL) integrated from previously established human (**b**) and mouse (**c**) datasets. In (**a**) cells contributed by distinct studies are highlighted in different colors; the corresponding references are given. **d,e** UMAP feature plots highlighting expression of selected MOL marker genes (**d**) and transcription factors (**e**) in the integrated object comprising MOL of both humans (blue) and mice (orange). **f** UMAP feature plots and violin plots exemplify genes that display preferential expression in MOL of humans (PMP2;PADI2) or mice (GJC3, TSPAN2, CA2).

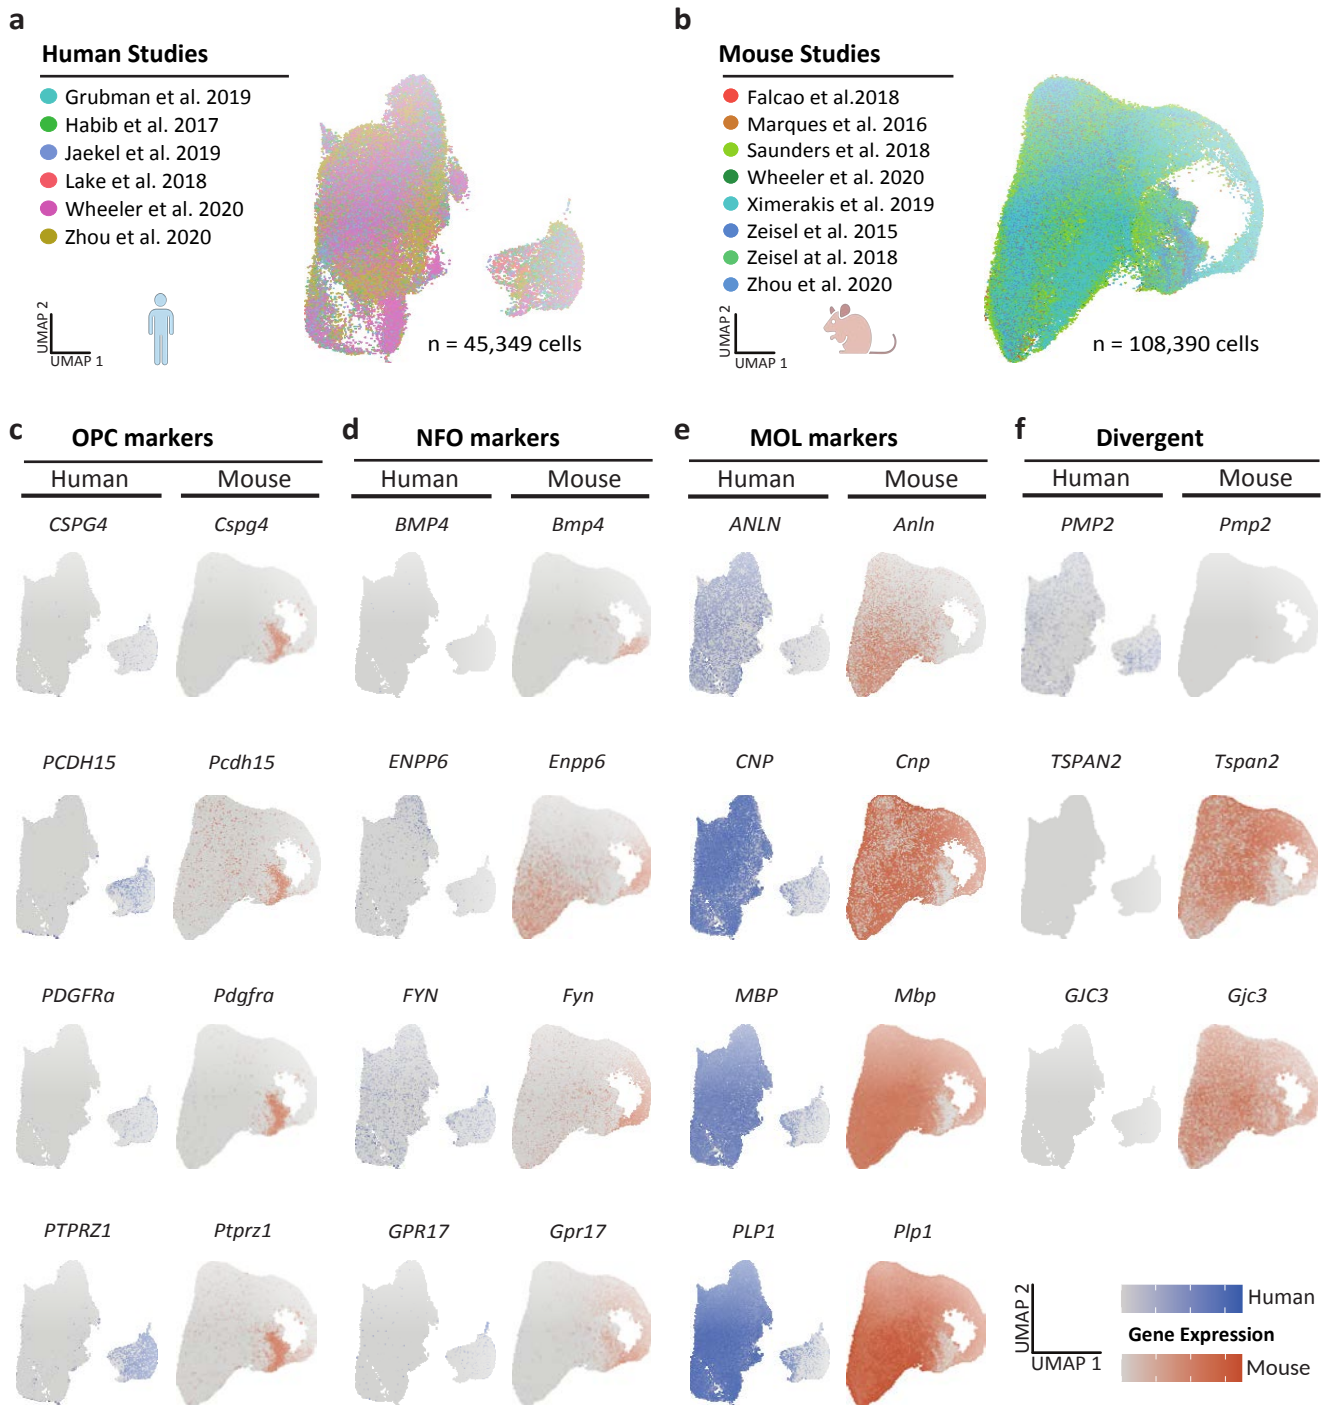

**Figure 3 - figure supplement 1. Integrated scRNA-seq profiles of the oligodendrocyte lineage in humans and mice.**

**a,b** UMAP plots of the scRNA-seq profiles of oligodendrocyte lineage cells integrated separately for humans (**a**) and mice (**b**) from previously published datasets. Cells contributed by distinct studies are highlighted in different colors; the corresponding references are given. **c-f** UMAP plots highlighting expression of marker genes for oligodendrocyte precursor cells (OPC; **c**), newly formed oligodendrocytes (NFO; **d**) and mature oligodendrocytes (MOL; **e**) in the integrated human (blue) and mouse (orange) datasets. Note that some genes display preferential expression in human (PMP2, CD9, CRYAB) or mouse (GJC3, TSPAN2, CA2) oligodendrocytes (**f**).

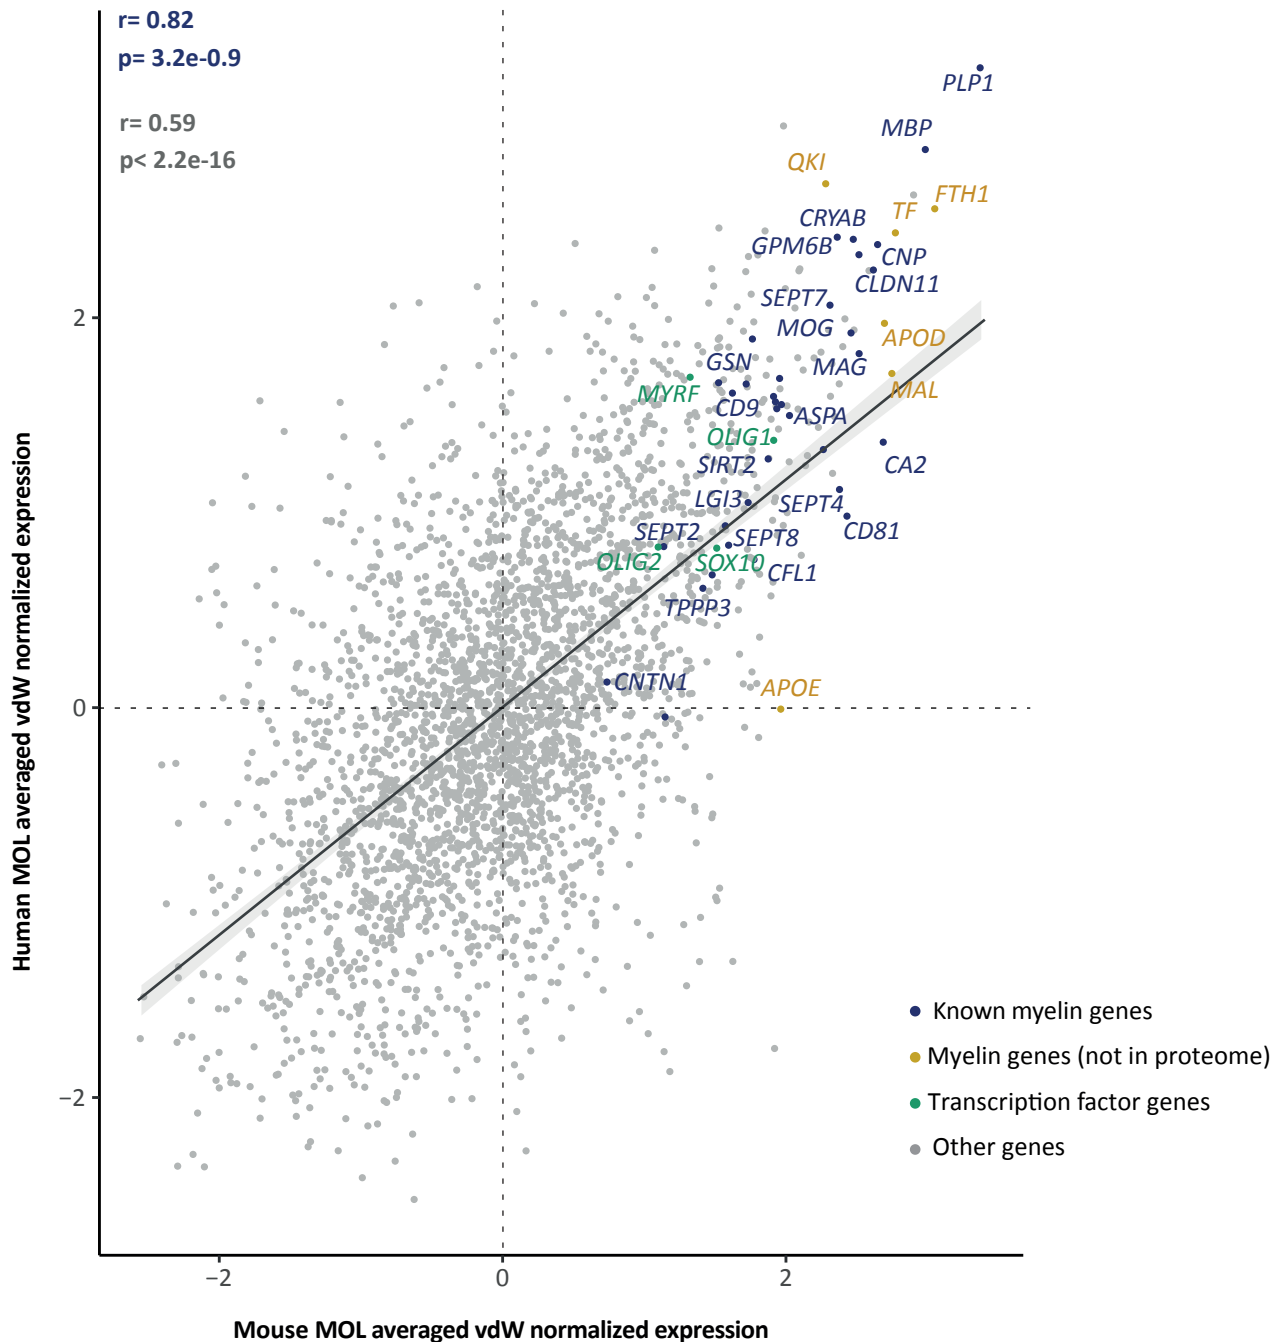

**Figure 3 - figure supplement 2. Cross species MOL transcriptome correlation.**

Scatter plot comparing the van der Waerden (vdW) score-transformed average expression of 3000 integration features in human and mouse mature oligodendrocytes (MOL). Data points of 34 known myelin-related transcripts that encode proteins represented in the myelin proteome are highlighted in blue (22 of which annotated with gene name); 6 known myelin-related transcripts of which the protein product is not present in the myelin proteome are highlighted in orange; 4 myelination-related transcription factors are highlighted in green; other transcripts are displayed in gray. Pearson correlation coefficient is given for known myelin-related transcripts (as highlighted in blue) or all transcripts. Regression line represents fit of data for navigational purpose.

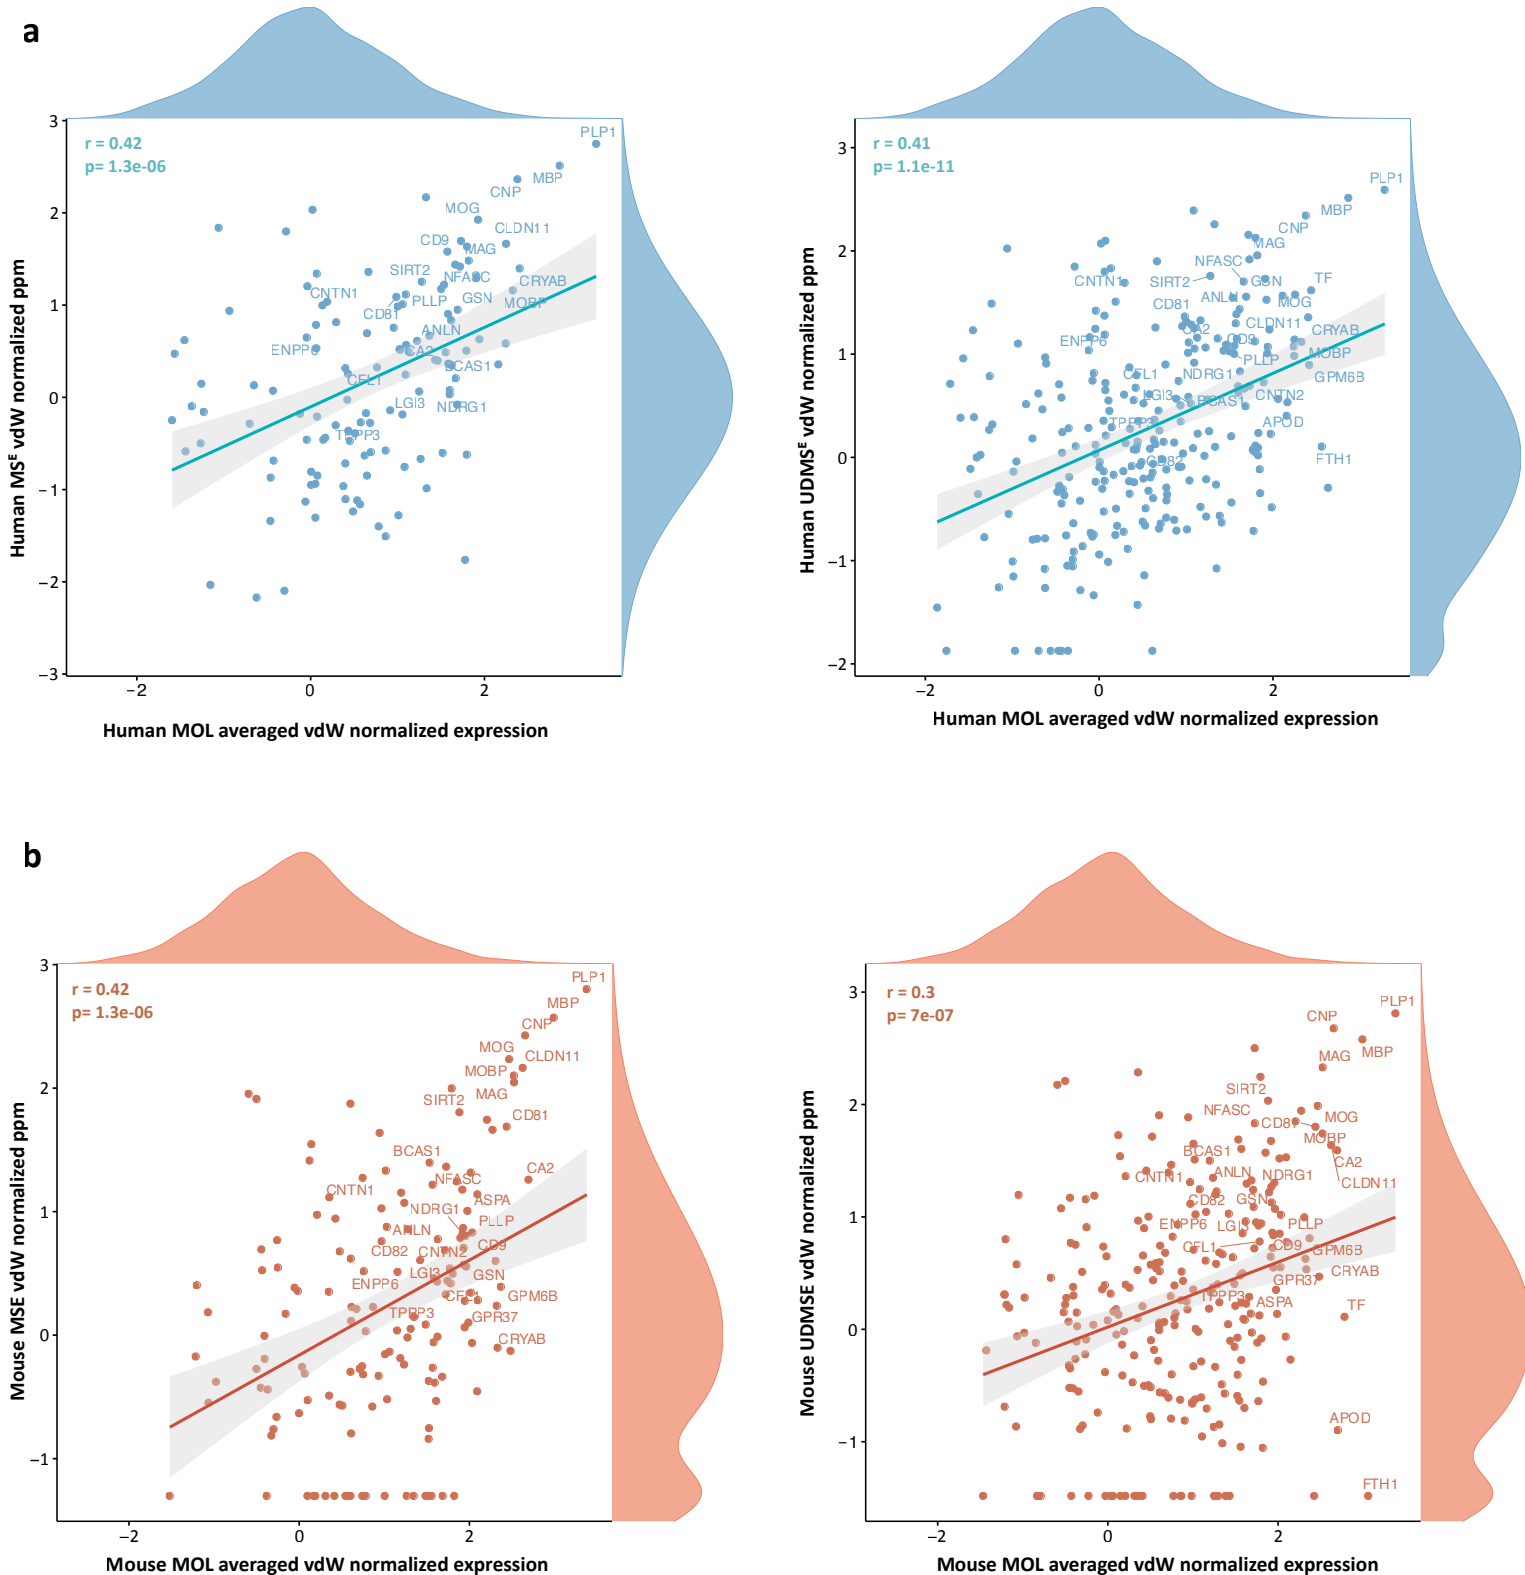

**Figure 3 - figure supplement 2. Comparisons of myelin proteome and MOL transcriptome**

vdW scores calculated from the mean abundance of integration features ( $n = 3,000$ ) in integrated scRNA-seq datasets of humans (**a,b**) and mice (**c,d**), and in the CNS myelin proteome in the corresponding species as acquired using the  $MS^E$  (**a,c**) and UDMSE (**b,d**) modes. vdW-normalized data were subjected to Pearson correlation analysis and visualized as scatter plot. Known myelin proteins are highlighted, and the distribution of normalized protein and RNA profiles are illustrated by density plots along the axes.



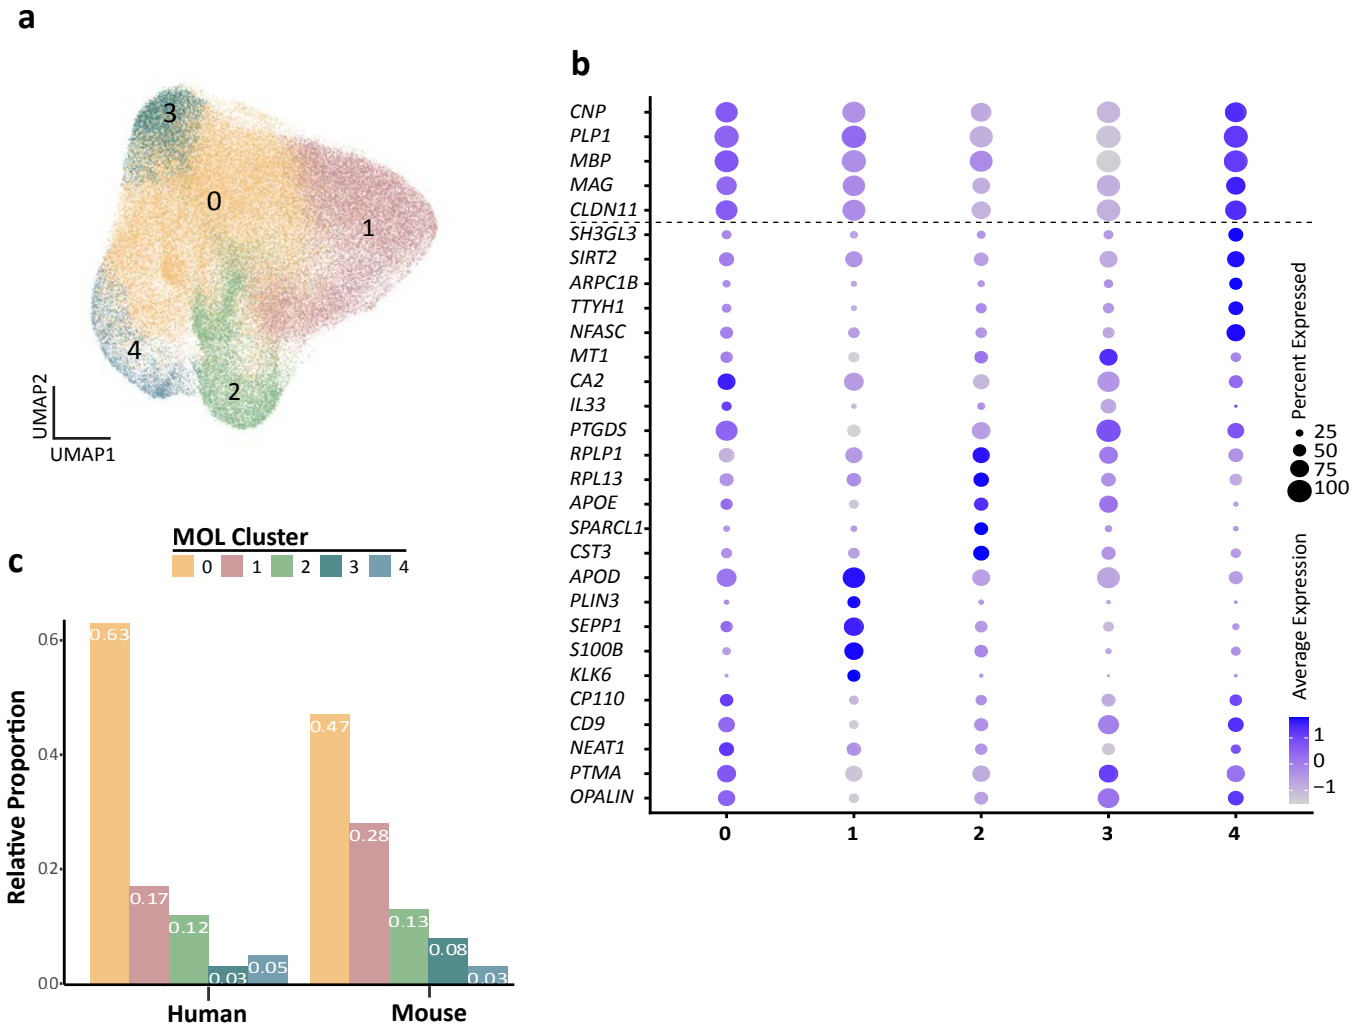

**Figure 4. Human and mouse mature oligodendrocyte subpopulation analysis.**

**a** UMAP plot showing five subpopulations of mature oligodendrocytes (MOL) identified upon integrating all human and mouse scRNA-seq datasets. **b** Bubble plot showing the top 5 subpopulation marker genes. All cells in all clusters also express high levels of known myelin-related marker transcripts (CNP, PLP1, MBP, MAG, CLDN11). **c** Relative proportion of mature oligodendrocyte subpopulations in humans and mice. Note that MOL of both species contribute to all subpopulations.



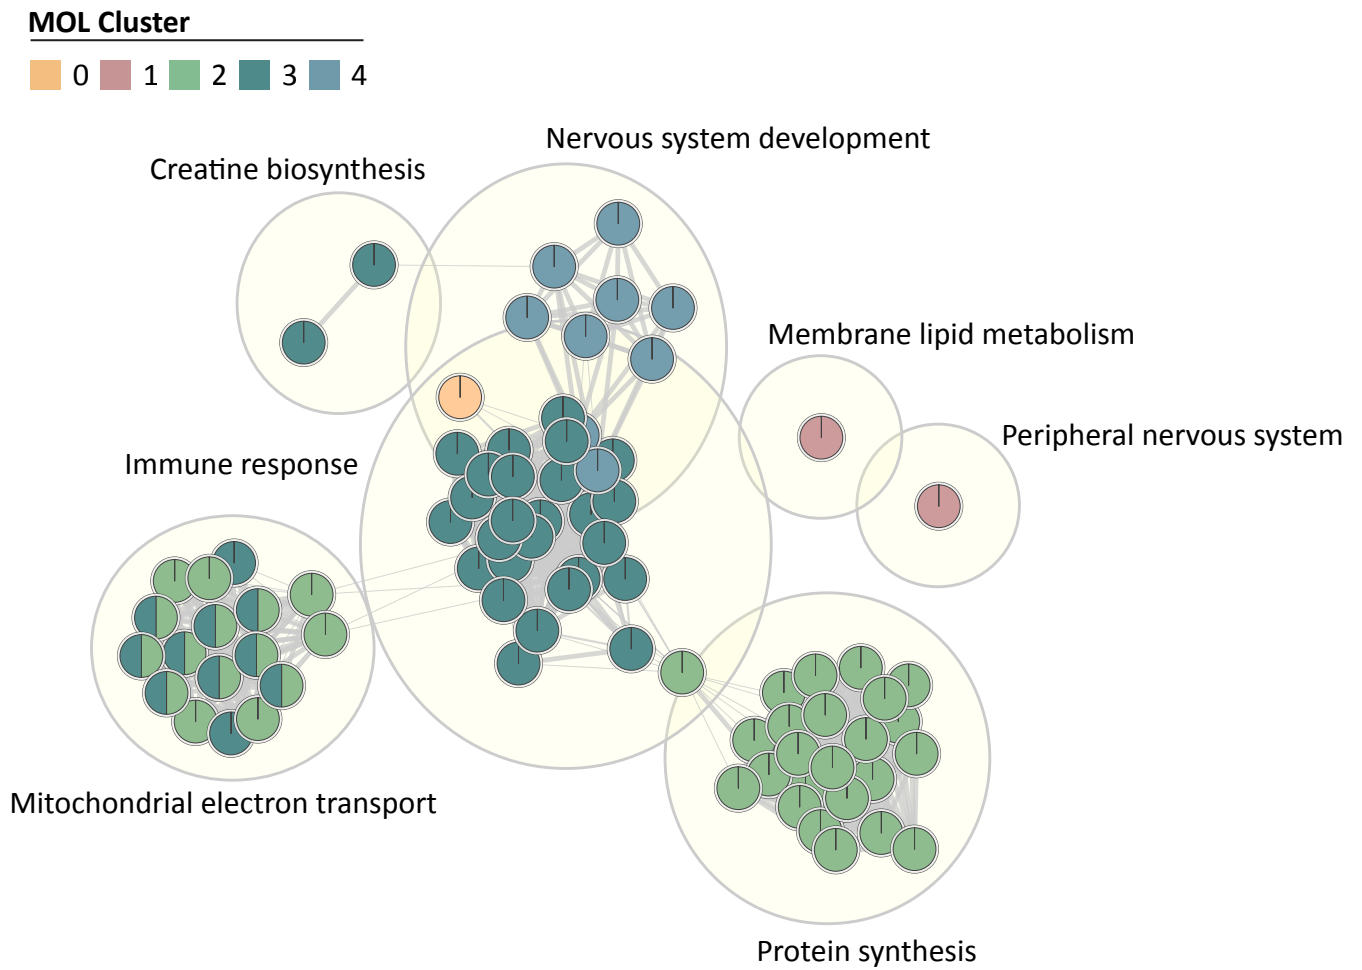

**Figure 4 - figure supplement 1. Gene ontology term topics enriched per subpopulation**

Gene ontology (GO) terms of biological processes (small circles) were grouped as topics (large circles). Colors represent association with MOL clusters displayed in **Figure 4**. FDR < 0.05.
